# Supplementary material for: Genome-wide physical activity interactions in adiposity ― A meta-analysis of 200,452 adults
Source: PLoS Genet. 2017 Apr 27;13(4):e1006528. doi: 10.1371/journal.pgen.1006528 (PMC5407576; doi:10.1371/journal.pgen.1006528)
Supplement: S1 Table — (XLSX) [file pgen.1006528.s006.xlsx]

## Sheet: TS1. Study Information
Supplementary Table 1 - Basic study information and description of outcome assessment (BMI, WC, WHR) and physical activity assessment
Study name	Ancestry	Study design	Region	Genotype Data (GWAS/MC)	Total genotyped sample size	Sample call rate	Sample exclusion criteria	BMI measured/ self-reported?	WHR measured/ self-reported?	WHR and BMI assessed at the same time?	Physical activity and BMI assessed at the same time?	Method for measuring physical activity	Study references PMID
AGES	European	Population-based	Iceland	GWAS	3219	>99%	1) Missing phenotypes 2) Mismatch previous genotypes	Measured	NA	NA	Yes	Physical activity was self-reported in a questionnaire.
ARIC	European	Population-based	USA-North America	GWAS	9713	>90%	1) first-degree relatives 2) ancestry outliers, gender mismatch 3) identity issues 4) excessive heterozygosity 5) missing height or weight	Measured	Measured	Yes	Yes	Total moderate/vigorous activity: total minutes/wk of vigorous and moderate activity. Active if subjects report engaging in ≥20 min/wk of leisure moderate/vigorous activity. Otherwise, inactive.	2646917
ARIC	African	Population-based	USA-North America	GWAS	3207	>90%	1) first-degree relatives 2) ancestry outliers, gender mismatch 3) identity issues 4) excessive heterozygosity 5) missing height or weight	Measured	Measured	Yes	Yes	Total moderate/vigorous activity: total minutes/wk of vigorous and moderate activity. Active if subjects report engaging in ≥20 min/wk of leisure moderate/vigorous activity. Otherwise, inactive.	2646917
AUSTWIN	European	Population-based	Australia	GWAS	2501	≥95%	1) Mendelian errors 2) HWE p <10-6 3) Sample call rate <96%	Self-reported	NA	NA	Yes	Physical activity was self-reported in a questionnaire.	6543278
BHS	European	Population-based	Australia	GWAS	1468	≥97%	1) Duplicates 2) sex check 3) ethnic outliers 4) relatedness	Measured	Measured	Yes	Yes	Physical activity was self-reported in a questionnaire.
B58C	European	Population-based	UK	GWAS	6481	≥97%	1) contamination 2) non-European identity 3) missing height or weight	Measured	Measured	Yes	Yes	Self-complete questionnaire, coded using Ainsworth BE, Haskell WL, Herrmann SD, Meckes N, Bassett Jr DR, Tudor-Locke C, Greer JL, Vezina J, Whitt-Glover MC, Leon AS. 2011 Compendium of Physical Activities: a second update of codes and MET values. Medicine and Science in Sports and Exercise, 2011;43(8):1575-1581.	17255346
CARDIA	European	Population-based	USA-North America	GWAS	1720	>95%	1) first-degree relatives 2) ancestry outliers 3) gender mismatch 4) identity issues 5) excessive heterozygosity 6) missing height or weight	Measured	Measured	Yes	Yes	Physical activity was assessed by validated questionnaire at the baseline examination (1985-1986) (acobs DR Jr., Hahn LP, Haskell WL, Pirie P, Sidney S. Validity and reliability of short physical activity history: CARDIA and the Minnesota Heart Health program. J Cardiopulm Rehabil. 1989;9:448–459). The physical activity questionnaire queried the time per week spent in leisure, occupational, and h…	3204420
CLHNS	East Asian (Filipino)	Population-based	Philippines	GWAS	1895	≥97%	1) 1st-degree relatives 2) missing phenotypes (age, weight, height, physical activity)	Measured	Measured	Yes	Yes	Physical activity was assessed by questionnaire	20507864
COLAUS	European	Population-based	Switzerland	GWAS	5435	≥90%	1) PCA outliers	Measured	Measured	Yes	Yes	In the CoLaus Study, physical activity was assessed by self-reported questionnaire at enrollment. Participants were asked on the questionnaire to estimate the average time per day spent of walking; more vigorous physical activity and their job type. Individuals with less than 20 min walking, less than 2 sport activity per week with sitting or standing job were classified as sedentary.	22415877, 18366642
FINRISK (COROGENE CONTROLS)	European	Population-based	Finland	GWAS	2051	≥ 95%	1) heterozygosity 2) duplicate 3) gender check 4) relatedness checks	Measured	Measured	Yes	Yes	Corogene controls are picked from the National FINRISK Study (COROGENE-STUDY Genetic Predisposition of Coronary Heart Disease in Patients Verified with Coronary Angiogram). Leisure time activity (divided in four categories) occupational activity (divided in four categories), and commuting physical activity (divided in six categories) were assessed by a self-reported questionnaire. For this study …	25422363
CROATIA-Korcula	European	Population-based	Croatia	GWAS	898	>97%	1) duplicates 2) gender mismatch 3) identity issues 4) excess heterozygosity	Measured	Measured	Yes	Yes	Physical activity was assessed by questionnaire
CROATIA-Vis	European	Population-based	Croatia	GWAS	924	>97%	1) duplicates 2) gender mismatch 3) identity issues 4) excess heterozygosity	Measured	Measured	Yes	Yes	Physical activity was assessed by questionnaire
DESIR	European	Case-control	France	GWAS	731	≥ 90%	1) Low call rate (none) 2) Ethnic outliers (n=15 dropped using STRUCTURE)	Measured	Measured	Yes	Yes	Physical activity was self-reported in a questionnaire.	8927780
DESIR	European	Population-based	France	MC	4993	≥ 90%	1) Missing data 2) Ethnic outliers (n=66 dropped using PCA)	Measured	Measured	Yes	Yes	Physical activity was self-reported in a questionnaire.	8927780
DR's EXTRA	European	Population-based	Finland	MC	1250	>99%	1) Missing phenotypes or age<18 2) Gender discrepancy or anomaly 3) Unexplained duplicate sample 4) Relateds across DR's EXTRA, FUSION, and METSIM	Measured	Measured	Yes	Yes	Leisure-time physical activity was assessed by a 12-month history, modified from the Minnesota Leisure Time Physical Activity Questionnaire. For each activity performed during the previous 12 months, the subject recorded the frequency, the average duration, and the mean intensity. A trained nurse checked and completed the questionnaire in an interview.	8177243
EGCUT	European	Population-based	Estonia	GWAS	6326	≥95%	1) low call rate 2) missing data 3) missing phenotypes 4) close relatives (IBD>0.1) removed	Measured	Measured	Yes	Yes	Physical activity was self-reported in a questionnaire.	24518929
Ely	European	Population-based	UK	MC	1602	≥95%	1) sex-check 2) relatedness check 3) ethnic ancestry outlying 4) hetezygosity check	Measured	Measured	Yes	Yes	Individually calibrated heart rate monitoring	17257284
EPIC	European	Case-cohort	UK	MC	1700	≥95%	1) sex-check 2) relatedness check 3) ethnic ancestry outlying 4) hetezygosity check	Measured	Measured	Yes	Yes	EPIC Physical Activity Questionnaire (Cambridge index)	10466767, 12795830
EPIC-Norfolk	European	Population-based	England	GWAS	2417	≥94%	1) relatedness 2) ethnic outlier 3) missing height	Measured	Measured	Yes	Yes	EPIC Physical Activity Questionnaire (Cambridge index)	10466767
ERF	European	Family-based	Netherlands	GWAS	3485	≥95%	1) gender mismatch 2) ethnic outliers 3) sex mismatch 4) excess heterozygosity 5) duplicates	Measured	Measured	Yes	No BMI measured in 2005	Self report	15845033
FamHS	European	Family-based	USA - North America	GWAS	3869	≥98%	1) To assess Mendelian errors, we ran LOKI on our family data and removed 5,035 SNPs with enough Mendelian errors to be considered outlier SNPs. 2) We also removed 2 individuals who had an unacceptable number (greater than 600) of Mendelian errors, making them outliers as compared to the rest of the population	Measured	Measured	Yes	Yes	In the Family Heart Study, leisure time physical activity was assessed by self-reported questionnaire at time of clinic visit. Participants were asked on the questionnaire to estimate the average time per week over the past year spent on light physical exercise such as leisurely walk or golf, softball, bowling, playing musical instrument, fishing, throwing frisbee, any activity that does not indu…	8651220
Fenland	European	Population-based	UK	GWAS	1500	≥95%	1) sex-check 2) relatedness check 3) ethnic ancestry outlying 4) hetezygosity check	Measured	Measured	Yes	Yes	Combined heart rate and movement sensing	20519560
Fenland	European	Population-based	UK	MC	3217	≥95%	1) sex-check 2) relatedness check 3) ethnic ancestry outlying 4) hetezygosity check	Measured	Measured	Yes	Yes	Combined heart rate and movement sensing	20519560
Framingham	European	Population-based	USA	GWAS	9274	≥ 97%	1) pHWE<1e-6 or call rate<97% 2) mishap p<1e-9 3) MAF<0.01 4) Mendelian errors>100 5) SNPs not in Hapmap or strandedness issues merging with Hapmap	Measured	Measured	Yes	Yes	Physical activity was assessed by questionnaire. Reference: Kannel, W. B. and P. Sorlie. Some health benefits of physical activity. The Framingham Study. Arch. Intern. Med. 139:857-861, 1979.	14025561 1208363 17372189
FUSION	European	Case-control	Finland	GWAS	2333	>99%	1) Missing phenotypes or age<18 2) Gender discrepancy or anomaly 3) Unexplained duplicate sample 4) Relateds	Measured	Measured	Yes	Yes	Physical activity was self-reported in the questionnaire. The questionnaire has shown good criterion validity against morbidity and mortality [HU, G., et al. (2006) Occupational, commuting and leisure-time physical activity in relation to coronary heart disease among middle-aged Finnish men and women. Atherosclerosis. 2007 Oct;194(2):490-7] and moderate correlation against accelerometer counts am…	17463248
FUSION2	European	Case-control	Finland	MC	2014	>99%	1) Missing phenotypes or age<18 2) Gender discrepancy or anomaly 3) Unexplained duplicate sample 4) Relateds across DR's EXTRA, FUSION, and METSIM	Measured	Measured	Yes	Yes	Physical activity was self-reported in the questionnaire. The questionnaire has shown good criterion validity against morbidity and mortality [HU, G., et al. (2006) Occupational, commuting and leisure-time physical activity in relation to coronary heart disease among middle-aged Finnish men and women. Atherosclerosis. 2007 Oct;194(2):490-7] and moderate correlation against accelerometer counts am…	17463248
Generation Scotland	European	Population-based	Scotland	GWAS	9860	>97%	1) duplicates 2) gender mismatch 3) identity issues 4) excess heterozygosity	Measured	Measured	Yes	Yes	Physical activity was assessed by questionnaire	22786799
GENOA	European	Cohort of sibships enriched for hypertension	USA - Rochester, MN	GWAS	1509	≥ 95%	1) Identical twins 2) sex mismatch 3) outliers (±6 SDs) on first 10 PCs from EIGENSTRAT	Measured	Measured	Yes	Yes	Physical activity was self-reported.	11799070; 15121494
GLACIER	European	Population-based	Sweden	MC	6064	>99%	1) missing age and sex	masured	Measured	Yes	Yes	Information on physical activity was obtained from self-administered validated questionnaires. Leisure time physical activity during the past three months was categorized as exercising: i) occasionally; ii) 1–2 times/week; iii) 2–3 times/week; or iv) >3 times/week. Occupational physical activity in most studies was categorized as i) sedentary or standing; ii) light but partly physically active; i…	23935507
GOOD	European	Population-based	Sweden	GWAS	941	>97.5%	1) heterozygosity > 33%; 2) ethnic outliers; 3) related individuals and 4) duplicates	Measured	Measured	Yes	Yes	At both the first study visit (baseline) and the 5-year follow-up visit, a standardized self-administered questionnaire previously described by Kemper et al in Bone (2002) was used. Information on type as well as of time (h/week) spent on physical activities in relation to sports was collected.	22247082
GOYA male	European	Case-Control (Obese)	Denmark	GWAS	1456	≥ 95%	1) heterozygosity > 35% and <30.2%; 2) ethnic outliers 3) related individuals 4) duplicates and 5) gender mismatches	Measured	Measured	Yes	Yes	Information on physical activity in leisure time (at follow up) was graded in four levels based on a questionnaire developed by Saltin and Grimby (PMID 14610530)	14610530; 15520825
HAPI Old Order Amish	European	Family-based	USA - Lancaster, PA	GWAS	761	≥95%	1) call rate <95% excluded	Measured	Measured	Yes	Yes	Accelerometer (Actical worn seven full days)	18779467
Health2006	European	Population-based	Capital region of Denmark	MC	3207	>99%	1) Individuals with 1st or 2nd degree familial relationship 2) extreme inbreeding coefficient 3) low call rate 4) mislabelled sex 5) high discordance to previous genotypings	Measured	Measured	Yes	Yes	Commuting and leisure-time physical activity were assessed by questionnaire. Reference: Thuesen et al. 2014, Cohort Profile: the Health2006 cohort, research centre for prevention and health. PMID: 23615486	23615486
HPFS	European	Population-based	USA	GWAS	2371	≥95%	1) samples with misidentified sex 2) related samples (siblings or possible first cousins) 3)samples with evidence of contamination 4)samples with highly variable intensity data 5)samples with missing call rates ≥2% were excluded 6) duplicates	Measured	Measured	Yes	Yes	Physical activity was self-reported in a questionnaire.	PMID: 8664406
HRS	African	Population-based	USA	GWAS	1519	>98%	1) duplicates 2) gender discrepancy 3) relatedness 4) ethnic outliers	Measured	NA	NA	Yes	In the Health and Retirement Study, physical activity was assessed via interview at the time of BMI measurement. Inactive individuals were defined as those who answered “hardly ever or never” to BOTH of the following questions: “How often do you participate in vigorous physical activity?”, and “How often do you participate in moderate physical activity?”. All other individuals were not missing th…	24671021
HRS	European	Population-based	USA	GWAS	8652	>98%	1) duplicates 2) gender discrepancy 3) relatedness 4) ethnic outliers	Measured	NA	NA	Yes	In the Health and Retirement Study, physical activity was assessed via interview at the time of BMI measurement. Inactive individuals were defined as those who answered “hardly ever or never” to BOTH of the following questions: “How often do you participate in vigorous physical activity?”, and “How often do you participate in moderate physical activity?”. All other individuals who were not missin…	24671021
HUNT	European	Population-based with enrichment for T2D cases	Norway	MC	1567	>99%	1) Missing phenotypes or age<18 2) Gender discrepancy or anomaly 3) Unexplained duplicate sample 4) Relateds	Measured	Measured	Yes	Yes	Holmen J, Midthjell K, et al. The Nord-Trøndelag Health Study 1995-97 (HUNT 2):Objectives, contents, methods and participation. Nor J Epidemiol 2003;13(1):19-32.
InCHIANTI	European	Population-based	Italy	GWAS	1210	≥97%	1) missing phenotype data 2) gender check 3) heterozygosity	Measured	Measured	Yes	Yes	Self report	11129752
Inter99	European	Population-based	Capital region of Denmark	MC	6127	>99%	1) Individuals with 1st or 2nd degree familial relationship 2) extreme inbreeding coefficient 3) low call rate 4) mislabelled sex and 5) high discordance to previous genotypings	Measured	Measured	Yes	Yes	Commuting and leisure-time physical activity were assessed by questionnaire. Reference: Engberg et al. 2010, Differential relationship between physical activity and progression to diabetes by glucose tolerance status: the Inter99 Study. PMID: 19898830	14663300; 12882858
KORA S3	European	Population-based	Germany	GWAS	1644	≥93%	1) missing German passport 2) missing height	Measured	Measured	Yes	Yes	Physical activity questionnaire about sport in winter, sport in summer and work/main environment	16032513; 16032514
KORA S3	European	Population-based	Germany	MC	3113	≥93%	none	Measured	Measured	Yes	Yes	Physical activity questionnaire about sport in winter, sport in summer and work/main environment	16032513; 16032514
KORA S4	European	Population-based	Germany	GWAS	1814	≥93%	1) missing German passport 2) missing height	Measured	Measured	Yes	Yes	Physical activity questionnaire about sport in winter, sport in summer and work/main environment	16032513; 16032514
KORA S4	European	Population-based	Germany	MC	3028	≥93%	none	Measured	Measured	Yes	Yes	Physical activity questionnaire about sport in winter, sport in summer and work/main environment	16032513; 16032514
LOLIPOP_EW610	European	Population-based	UK - London	GWAS	945	≥95%	1) duplicates 2) gender discrepancy 3) contaminated samples 4) relatedness	Measured	Measured	Yes	Yes	The assessment of participants was carried out by trained research nurses according to a standarsied protocol. A questionnaire based face-to-face interview was administered to each participant, who were asked the types of physical activities undertaken in the last week. For each level of activity, yes or no was circled. For each item marked as yes, the number of days in typical week was given. Fo…	21909110
LOLIPOP_IA317	Indian Asian	Population-based with some enrichment	UK - London	GWAS	2694	≥95%	1) Duplicates, 2) gender discrepancy, 3) ethnic outliers, 4) contaminated samples, 5) relatedness, 6) samples already in IA610	Measured	Measured	Yes	Yes	The assessment of participants was carried out by trained research nurses according to a standarsied protocol. A questionnaire based face-to-face interview was administered to each participant, who were asked the types of physical activities undertaken in the last week. For each level of activity, yes or no was circled. For each item marked as yes, the number of days in typical week was given. Fo…	18454146
LOLIPOP_IA610	Indian Asian	Case-control (CHD)	UK - Lodon	GWAS	7032	≥95%	1) duplicates 2) gender discrepancy 3) ethnic outliers 4) contaminated samples 5) relatedness	Measured	Measured	Yes	Yes	The assessment of participants was carried out by trained research nurses according to a standarsied protocol. A questionnaire based face-to-face interview was administered to each participant, who were asked the types of physical activities undertaken in the last week. For each level of activity, yes or no was circled. For each item marked as yes, the number of days in typical week was given. Fo…	19820698
LURIC	European	Case-control	Ludwigshafen, Germany	GWAS	2984	≥ 95%	1) related individuals 2) ambigous sex	Measured	Measured	Yes	Yes	The assessment was carried out via questionnaires	11258203
MEC	African	Population-based	USA-North America	MC	455	>95%	1) first-degree relatives 2) ancestry outliers 3) gender mismatch 4) identity issues 5) excessive heterozygosity 6)missing height or weight	Measured	Measured	Yes	Yes	The participants completed a self-administered questionnaire at baseline.	10695593
MESA	White	Population-based	USA: NC, NY, MD, MN, IL, CA	GWAS	2686	≥95%	1) excess heterozygosity >53% 2) gender mismatch 3) cryptic relatedness	Measured	Measured	Yes	Yes	Physical activity was self-reported in a questionnaire.	12397006
METSIM	European	Population-based with enrichment for T2D cases	Finland	MC	2162	>99%	1) Missing phenotypes or age<18 2) Gender discrepancy or anomaly 3) Unexplained duplicate sample 4) Relateds across DR's EXTRA, FUSION, and METSIM	Measured	Measured	Yes	Yes	Physical activity was self-reported in the questionnaire and the questions have remained the same over the years. The questionnaire has shown good criterion validity against morbidity and mortality [HU, G. et al. (2006) Occupational, commuting and leisure-time physical activity in relation to coronary heart disease among middle-aged Finnish men and women. Atherosclerosis. 2007 Oct;194(2):490-7] a…	19223598
NESDA	European	Population-based	The Netherlands	GWAS	1797	>90%	1) Duplicates, 2) gender discrepancy, 3) contaminated samples, 4) relatedness	Measured	Measured	Yes	Yes	Physical activity was assessed at NESDA baseline with the International Physical Activity Questionnaire (IPAQ) and expressed in Metabolic Equivalent Total (MET)-min/week. A more detailed description is given in Ref-PMID: 20734363	18763692
NTR	European	Population-based	The Netherlands	GWAS	3711	>90%	1) duplicates 2) gender discrepancy 3) contaminated samples 4) relatedness	Measured	Measured	Yes	No, PA through the 2-yearly surveys. Survey closest in time to the BMI measurement was chosen (83% within a 2 year interval of BMI measurement)	Weekly METhours were computed as described in : de Moor MHM & de Geus EJC (2013) Genetic influences on exercise behavior. In: Rippe, JM. (Ed) Lifestyle Medicine Taylor & Francis, LLC, Boca Raton, FL, USA, pp. 1367-1378	23298648
NFBC66	European	Prospective general population-based	Lapland and the Province of Oulu in Northern Finland	GWAS	5654	>95%	1) gender discrepance with genetic data from X-linked markers 2) withdrawn consent 3) duplicates and first and second degree relatives 4) contaminated samples	Measured	Mesaured	Yes	Yes	The participants were asked about the frequency, intensity, and duration of their leisure-time physical activity. The frequency and duration of one bout of physical activity was investigated separately for light and brisk activities, where the term "brisk" was defined on the questionnaire as activity causing at least some sweating and shortage of breath and "light" as activity causing no sweating…	19060910
NHS	European	Population-based	USA	GWAS	2368	≥95%	1) samples with misidentified sex 2) related samples (siblings or possible first cousins) 3)samples with evidence of contamination 4)samples with highly variable intensity data 5)samples with missing call rates ≥2% were excluded 6) duplicates	Measured	Measured	Yes	Yes	Physical activity was self-reported in a questionnaire.	7860180
NSHD	European	Birth cohort	UK	MC	2476	≥95%	1) sex-check 2) relatedness check 3) ethnic ancestry outlying 4) heterozygosity check	Measured	Measured	Yes	Yes	In the MRC National Survey of Health and Development, leisure time physical activity was assessed as part of the home visit interview in 1999. Study members were asked to report whether or not they participated in any sports, vigorous leisure activities or any exercises in spare time, not including getting to and from work, in the last 4 weeks, and on how many occasions they had undertaken these …	15814867; 16204333
NSPHS	European	Population-based	Sweden	GWAS	656	>99%	1) Missing phenotypes or age<18 2) Gender discrepancy or anomaly 3) Ethnic outliers	Measured	NA	NA	Yes	Physical activity was self-reported in a questionnaire.	18952825
ORCADES	European	Population-based	Scotland	GWAS	889	>97%	1) duplicates 2) gender mismatch 3) identity issues 4) excess heterozygosity	Measured	Measured	Yes	Yes	Physical activity was assessed by questionnaire	18760389
QFS	European	Population-based	Quebec - Canada	GWAS	929	≥95%	NA	Measured	Measured	Yes	Yes	In QFS, physical activity level was assessed using a 3-day activity diary, which incuded one weekend day. For each of the three days, subjects were asked to record the dominant activity for each 15-min period of the day using a list of categorized activities. In those categories, which ranged from 1 to 9, activities were ordered in increasing magnitude of based on the MET equivalent of each activ…	12900690
RISC	European	Population-based	UK	GWAS	1566	≥95%	1) non-European descent 2) gender mismatch	Measured	Measured	Yes	Yes	Physical activity was assessed using Actigraph accelerometer for a median of 6 days	14968294 18591396
Rotterdam Study	European	Population-based	The Netherlands	GWAS	5974	≥95%	1) gender mismatch with typed X-linked markers 2) excess autosomal heterozygosity (F<0.055) 3) duplicates and/or 1st degree relatives using IBD PiHAT >40% from PLINK 4) ethnic outliers IBS distances >4 SD mean HapMap CEU cluster from PLINK	Measured	Measured	Yes	Yes	Physical activity was assessed by self-administered questionnaire	19728115
Sardinia	European	Population-based	Ogliastra Region in Sardinia (Italy)	GWAS	4694	0.95	1) gender discrepancy with genetic data from X‐linked marker 2) discrepancy between genetically inferred relationship with other samples and reported pedigree information	measured	measured	yes	yes	Physical activity was assessed using a self-report questionnaire	16934002, 22291609
SHIP	European	Population-based	Germany - West Pomerania	GWAS	4081	>92%	1) duplicates 2) gender discrepancy	Measured	Measured	Yes	Yes	The assessment was carried out via questionaire. The questions were asked separately for summer and winter sporting activities, and were merged for analysis. Answers were possible in the following categories: regularly more than 2 hours per week, regularly 1 to 2 hours per week, less than 1 hour per week, no sporting activity, do not know, or refuse to answer. Participants who answered that they …	20167617
SORBS	European	Population-based	Germany	GWAS	1097	≥ 94%	1) gender mismatch 2) ethnic outliers 3) duplicates	Measured	Measured	Yes	Yes	Physical activity was assessed by questionnaire	19584900
TRAILS	European	Population-based	The Netherlands	GWAS	1354	≥95%	1) heterozygosity 2) duplicate and MZ samples 3) sex mismatch 4) non-caucasians	Measured	Measured	Yes	Yes	Physical activity was assessed by means of a questionaire (Stavrakakis N, De Jonge P, Ormel J, Oldehinkel AJ. Bidirectional prospective associations between physical activity and depressive symptoms. The TRAILS study. J Adolesc Health 2012; 50: 503-8). Subjects reported the average number of minutes spent sporting per week. The 20% of men and 20% of women with the lowest age-adjusted total-time s…	18263649, 23021478, 25431468
TwinsUK	European	Population-based	UK	GWAS	5654	>98%	1) Heterozygosity across all SNPs ≥2 S.D. from the sample mean 2) evidence of non‐European ancestry as assessed by PCA 3) observed pairwise IBD probabilities suggestive of sample identity errors	Measured	Measured	Yes	Yes	The assessment was carried out via questionnaires Q2 (1999-2000) and Q11a (2004-2008) which asked “During the last 12 months, how would you describe the kind of physical activity you performed at work?” and “In the past year, how frequently have you typically engaged in physical exercise that raise your heart rate and last for 20 minutes at a time?”, respectively. Individuals were defined as inac…	22253318
WGHS	European	Population-based	USA-North America	GWAS	23294	≥98%	NA	Self-reported	Self-reported	No, waist and WHR assessed 6 years after BMI	Yes	In the Women's Genome Health Study, leisure time physical activity was assessed by self-reported questionnaire at enrollment. Participants were asked on the questionnaire to estimate the average time per week over the past year spent on eight groups of recreation activites and to report the number of flights of stairs climbed daily. A MET score was assigned to each activity based on the the energ…	18070814
WHI	African	Population-based	USA-North America	MC	5711	>95%	1) first-degree relatives 2) ancestry outliers 3) gender mismatch 4) identity issues 5) excessive heterozygosity 6) missing height or weight	Measured	Measured	Yes	Yes	Total moderate/vigorous activity: total minutes/wk of vigorous and moderate activity. Active if subjects report engaging in ≥20 min/wk of leisure moderate/vigorous activity. Otherwise, inactive.
Whitehall	European	Cohort of London-based civil servants	UK	MC	2413	≥95%	1) missing phenotype data 2) gender check 3) duplicates check 4) relatedness check 5) ethnic check	Measured	Measured	Yes	Yes	The questionnaire on physical activity assessed both leisure-time and job-related activities, using the following instructions: “We would like to know about your activities at work and in your free time that involve physical activity.” The questionnaire included 20 items on the amount of time spent in the following activities: walking, sports (cycling, soccer, golf, swimming, and 2 open-ended que…	15576467, 21441441
YFS	European	Population-based	Finland	GWAS	2442	≥95%	1) gender mismatch 2) excess heterozygosity 3) duplicates 4) cryptic relatedness 5) ethnic outliers	Measured	Measured	Yes	Yes	Physical activity was self-reported in a questionnaire.	18263651
