# Supplementary material for: Genome-wide physical activity interactions in adiposity ― A meta-analysis of 200,452 adults
Source: PLoS Genet. 2017 Apr 27;13(4):e1006528. doi: 10.1371/journal.pgen.1006528 (PMC5407576; doi:10.1371/journal.pgen.1006528)
Supplement: S3 Table — (XLSX) [file pgen.1006528.s008.xlsx]

## Sheet: TS3. Characteristics Overall
Supplementary Table 3 - Population characteristics for inactive and active individuals combined in the participating studies
Study (Genotype Data)			Stage	Genotype Data	Sex strata	Ancestry	N	Age (y)		BMI (kg/m2)		BMI categories						Waist (cm)		WHR (ratio)
												18 to <25 Normal weight		25 to <30 Overweight		≥30 Obese
Units	Email	Date of Entry	(1/2)	(GWAS/MC)	W/M/Overall	Af/Eu/Hs/As		Mean	SD	Mean	SD	n	%	n	%	n	%	mean	SD	mean	SD
AGES	albert@hjarta.is	2015-04-07	1	GWAS	O	Eu	3186	76.4	5.46	27.09	4.41	998	0.316524	1456	0.461782	699	0.221694	100.78	12.14	NA	NA
AGES	albert@hjarta.is	2015-04-07	1	GWAS	W	Eu	1842	76.31	5.56	27.17	4.81	594	0.327273	782	0.430854	439	0.241873	99.5	13.07	NA	NA
AGES	albert@hjarta.is	2015-04-07	1	GWAS	M	Eu	1344	76.53	5.32	26.98	3.78	404	0.301943	674	0.503737	260	0.19432	102.53	10.48	NA	NA
ARIC (African Ancestry)	rohde@unc.edu	2005-03-31	2	GWAS	O	Af	2611	53.29	5.79	29.68	6.08	544	0.2083	1004	0.3845	1063	0.4071	99.31	15.03	0.92	0.08
ARIC (African Ancestry)	rohde@unc.edu	2015-03-31	2	GWAS	M	Af	963	53.53	5.99	27.99	4.83	255	0.2648	423	0.4393	285	0.296	97.83	12.67	0.94	0.05
ARIC (African Ancestry)	rohde@unc.edu	2015-03-31	2	GWAS	W	Af	1648	53.15	5.67	30.66	6.5	289	0.1754	581	0.3525	778	0.4721	100.18	16.19	0.91	0.08
ARIC (European Ancestry)	migraff@email.unc.edu	2015-04-04	1	GWAS	O	Eu	8402	54.3	5.69	27.04	4.89	3116	0.3706	3363	0.3999	1923	0.2289	96.23	13.41	0.93	0.08
ARIC (European Ancestry)	migraff@email.unc.edu	2015-04-04	1	GWAS	W	Eu	4423	53.96	5.68	26.65	5.52	2048	0.463	1343	0.3036	1032	0.2333	93.12	14.87	0.89	0.08
ARIC (European Ancestry)	migraff@email.unc.edu	2015-04-04	1	GWAS	M	Eu	3979	54.67	5.68	27.48	4.04	1068	0.2684	2020	0.5077	891	0.2239	99.69	10.55	0.97	0.05
AUSTWIN	john.whitfield@qimrberghofer.edu.au	25/6/2015	1	GWAS	O	Eu	2426	31.85	11.24	22.46	3.13	1998	0.824	372	0.153	56	0.023	NA	NA	NA	NA
AUSTWIN	john.whitfield@qimrberghofer.edu.au	25/6/2015	1	GWAS	W	Eu	1706	32.81	11.74	22.17	3.21	1445	0.848	214	0.125	45	0.026	NA	NA	NA	NA
AUSTWIN	john.whitfield@qimrberghofer.edu.au	25/6/2015	1	GWAS	M	Eu	720	29.61	9.61	23.17	2.8	551	0.765	158	0.219	11	0.015	NA	NA	NA	NA
BHS	gemma.cadby@uwa.edu.au	17/06/2015	1	GWAS	W	Eu	645	54.31	16.81	25.43	4.37	347	0.538	192	0.298	102	0.158	80.62	11.42	0.8	0.07
BHS	gemma.cadby@uwa.edu.au	17/06/2015	1	GWAS	M	Eu	470	54.08	16.62	26.58	3.57	165	0.351	222	0.472	80	0.17	93.68	10.3	0.94	0.06
B58C	d.strachan@sgul.ac.uk	2015-03-08	2	GWAS	W	Eu	3255	45.16	0.39	26.92	5.53	1426	0.438	1063	0.327	751	0.23	85.32	12.61	0.81	0.06
B58C	d.strachan@sgul.ac.uk	2015-03-08	2	GWAS	M	Eu	3226	45.17	0.38	27.88	4.29	791	0.245	1594	0.494	834	0.259	98.62	11.11	0.93	0.06
CARDIA	Myriam.Fornage@uth.tmc.edu	2015-03-30	1	GWAS	O	Eu	1474	25.65	3.33	23.64	3.79	1063	0.7211	325	0.2206	86	0.0584	77.02	10.32	0.78	0.07
CARDIA	Myriam.Fornage@uth.tmc.edu	2015-03-30	1	GWAS	W	Eu	778	25.65	3.39	22.94	3.84	615	0.7904	119	0.1532	44	0.0566	71.4	8.03	0.72	0.05
CARDIA	Myriam.Fornage@uth.tmc.edu	2015-03-30	1	GWAS	M	Eu	696	25.65	3.28	24.43	3.58	448	0.6437	206	0.296	42	0.0603	83.27	8.87	0.84	0.05
CLHNS	ying_wu@med.unc.edu	2015-03-31	1	GWAS	W	As	1773	48.45	6.1	24.31	4.37	1025	0.5781	580	0.3271	168	0.0948	81.1	10.88	0.88	0.05
COLAUS	zoltan.kutalik@unil.ch	26/01/2015	1	GWAS	W	Eu	2875	53.894	10.7156	25.1645	4.8979	1590	0.553	820	0.2852	419	0.1457	83.523	12.4678	0.8274	0.0684
COLAUS	zoltan.kutalik@unil.ch	26/01/2015	1	GWAS	M	Eu	2560	52.938	10.7699	26.6263	4.0151	938	0.3664	1170	0.457	440	0.1719	95.9289	11.2368	0.93	0.0616
FINRISK (COROGENE CONTROLS)	kati.kristiansson@thl.fi	2015-02-16	1	GWAS	W	Eu	804	56.32	12.19	26.69	5.01	336	0.4179	299	0.3719	164	0.204	85.63	12.65	0.84	0.07
FINRISK (COROGENE CONTROLS)	kati.kristiansson@thl.fi	2015-02-16	1	GWAS	M	Eu	908	53.53	12.35	27.18	3.94	275	0.3029	440	0.4846	191	0.2104	96.98	11.55	0.96	0.07
CROATIA-Korcula	Jennifer.Huffman@nih.gov	2015-04-02	1	GWAS	O	Eu	898	56.27	13.94	27.96	4.14	206	0.2341	417	0.4739	257	0.292	94.19	12.16	0.9	0.09
CROATIA-Korcula	Jennifer.Huffman@nih.gov	2015-04-02	1	GWAS	W	Eu	573	55.54	13.71	27.52	4.35	165	0.2926	250	0.4433	149	0.2642	90.85	11.91	0.87	0.08
CROATIA-Korcula	Jennifer.Huffman@nih.gov	2015-04-02	1	GWAS	M	Eu	325	57.55	14.27	28.76	3.6	41	0.1297	167	0.5285	108	0.3418	100.12	10.18	0.96	0.07
CROATIA-Vis	Jennifer.Huffman@nih.gov	2015-04-04	1	GWAS	O	Eu	924	56.36	15.54	27.32	4.27	271	0.2988	396	0.4366	240	0.2646	95.84	11.79	0.94	0.08
CROATIA-Vis	Jennifer.Huffman@nih.gov	2015-04-04	1	GWAS	W	Eu	536	56.72	16	27.19	4.65	180	0.3442	194	0.3709	149	0.2849	94.14	12.74	0.91	0.08
CROATIA-Vis	Jennifer.Huffman@nih.gov	2015-04-04	1	GWAS	M	Eu	388	55.88	14.9	27.49	3.69	91	0.237	202	0.526	91	0.237	98.16	9.91	0.97	0.06
DESIR_GWAS	loic.yengo@good.ibl.fr	2015-04-07		GWAS	M	Eu	178	52.65	5.59	23.15	1.16	178	1	0	0	0	0	84.56	5.38	0.89	0.04
DESIR_GWAS	loic.yengo@good.ibl.fr	2015-04-07		GWAS	O	Eu	715	49.93	8.07	21.81	1.87	715	1	0	0	0	0	74.26	8.22	0.8	0.07
DESIR_GWAS	loic.yengo@good.ibl.fr	2015-04-07		GWAS	W	Eu	537	49.02	8.56	21.36	1.85	537	1	0	0	0	0	70.85	5.8	0.76	0.05
DESIR_MC	loic.yengo@good.ibl.fr	2015-04-07		MC	M	Eu	2296	46.16	10.11	25.61	3.4	1022	0.4453	1047	0.4562	226	0.0985	90.09	9.7	0.92	0.06
DESIR_MC	loic.yengo@good.ibl.fr	2015-04-07		MC	O	Eu	4265	46.26	10.21	25.23	3.86	2183	0.5122	1612	0.3782	467	0.1096	84.91	11.62	0.87	0.09
DESIR_MC	loic.yengo@good.ibl.fr	2015-04-07		MC	W	Eu	1969	46.37	10.32	24.78	4.29	1161	0.5902	565	0.2872	241	0.1225	78.86	10.72	0.8	0.07
DR's EXTRA	aujackso@umich.edu	2015-03-03	2	MC	W	Eu	621	66.47	5.25	27.57	5.04	215	0.346	246	0.396	160	0.258	88.71	13.11	0.87	0.067
DR's EXTRA	aujackso@umich.edu	2015-03-03	2	MC	M	Eu	544	66.49	5.44	27.36	3.74	147	0.27	288	0.529	109	0.2	98.16	10.7	0.99	0.054
EGCUT (370CNV)	toomas.haller@ut.ee	2015-03-30	1	GWAS	O	Eu	855	39.04	15.66	25.89	5.22	420	0.4912	284	0.3322	151	0.1766	87.79	14.28	0.85	0.09
EGCUT (370CNV)	toomas.haller@ut.ee	2015-03-30	1	GWAS	W	Eu	417	40.88	15.63	25.97	6.08	215	0.5156	109	0.2614	93	0.223	83.63	14.87	0.8	0.08
EGCUT (370CNV)	toomas.haller@ut.ee	2015-03-30	1	GWAS	M	Eu	438	37.29	15.51	25.81	4.24	205	0.468	175	0.3995	58	0.1324	91.75	12.49	0.9	0.08
EGCUT (metabo)	toomas.haller@ut.ee	2015-03-30	1	GWAS	O	Eu	1198	52.47	9.44	26.16	5.99	658	0.5492	248	0.207	292	0.2437	87.45	17.13	0.86	0.11
EGCUT (metabo)	toomas.haller@ut.ee	2015-03-30	1	GWAS	W	Eu	715	51.53	9.33	25.6	6.26	445	0.6223	121	0.1692	149	0.2084	82.03	16.28	0.81	0.08
EGCUT (metabo)	toomas.haller@ut.ee	2015-03-30	1	GWAS	M	Eu	483	53.86	9.43	27	5.47	213	0.441	127	0.2629	143	0.2961	95.44	15.1	0.94	0.1
EGCUT (omni1)	toomas.haller@ut.ee	2015-03-30	1	GWAS	O	Eu	1532	61.65	20.55	27.21	5.2	571	0.3727	562	0.3668	399	0.2604	93.22	14.51	0.9	0.1
EGCUT (omni1)	toomas.haller@ut.ee	2015-03-30	1	GWAS	W	Eu	752	66.42	20.95	27.42	5.5	281	0.3737	251	0.3338	220	0.2926	89.53	14.07	0.85	0.08
EGCUT (omni1)	toomas.haller@ut.ee	2015-03-30	1	GWAS	M	Eu	780	57.06	19.08	27.02	4.89	290	0.3718	311	0.3987	179	0.2295	96.78	14.04	0.94	0.09
EGCUT (omni2)	toomas.haller@ut.ee	2015-03-30	1	GWAS	O	Eu	2741	42.25	13.35	26.58	5.06	1188	0.4334	934	0.4308	619	0.2258	89.25	14.38	0.86	0.1
EGCUT (omni2)	toomas.haller@ut.ee	2105-03-30	1	GWAS	W	Eu	1501	42.25	13.31	26.12	5.38	738	0.4917	442	0.2945	321	0.2139	84.15	13.29	0.81	0.08
EGCUT (omni2)	toomas.haller@ut.ee	2015-03-30	1	GWAS	M	Eu	1240	42.24	13.4	27.13	4.6	450	0.3629	492	0.3968	298	0.2403	95.84	13.01	0.92	0.08
Ely	jianan.luan@mrc-epid.cam.ac.uk	16/01/2015	2	MC	W	Eu	381	53.41	10.26	26.08	4.64	185	0.486	131	0.344	65	0.171	81.15	11.11	0.8	0.07
Ely	jianan.luan@mrc-epid.cam.ac.uk	16/01/2015	2	MC	M	Eu	282	54.18	10.39	26.57	3.07	94	0.333	151	0.535	37	0.131	94.37	9.41	0.95	0.07
EPIC-non-subcohort	jianan.luan@mrc-epid.cam.ac.uk	16/01/2015	2	MC	W	Eu	218	62.74	8.49	28.97	4.6	41	0.188	100	0.459	77	0.353	90.48	11.58	0.84	0.06
EPIC-non-subcohort	jianan.luan@mrc-epid.cam.ac.uk	16/01/2015	2	MC	M	Eu	323	61.97	8.39	28.37	3.57	36	0.111	219	0.678	68	0.211	101.91	9.69	0.97	0.05
EPIC-Norfolk	jinghua.zhao@mrc-epid.cam.ac.uk	2015-03-31	1	GWAS	W	Eu	1285	58.75	9	26.19	4.39	569	0.4438	489	0.3814	224	0.1747	81.94	10.77	0.79	0.06
EPIC-Norfolk	jinghua.zhao@mrc-epid.cam.ac.uk	2015-03-31	1	GWAS	M	Eu	1132	59.81	9.03	26.62	3.21	347	0.3068	626	0.5535	158	0.1397	95.81	9.45	0.93	0.06
EPIC-subcohort	jianan.luan@mrc-epid.cam.ac.uk	16/01/2015	2	MC	W	Eu	478	58.98	9.6	25.65	3.78	229	0.479	196	0.41	53	0.111	81.01	10.08	0.79	0.06
EPIC-subcohort	jianan.luan@mrc-epid.cam.ac.uk	16/01/2015	2	MC	M	Eu	340	59.45	9.06	26	2.96	131	0.385	183	0.538	26	0.076	93.96	9.13	0.92	0.06
ERF	a.demirkan@erasmusmc.nl	2015-09-07	1	GWAS	O	Eu	1560	48.47	14.06	26.78	4.66	563	0.369	659	0.432	303	0.199	86.76	13.62	0.86	0.1
ERF	a.demirkan@erasmusmc.nl	2015-09-07	1	GWAS	W	Eu	901	47.71	14.34	26.33	4.87	381	0.435	325	0.371	170	0.194	81.13	11.88	0.79	0.08
ERF	a.demirkan@erasmusmc.nl	2015-09-07	1	GWAS	M	Eu	659	49.51	13.59	27.39	4.29	182	0.28	334	0.515	133	0.205	94.39	12.04	0.94	0.08
FamHS	llbarata@dsg.wustl.edu	2014-10-02	1	GWAS	O	Eu	3663	52.2	13.64	27.75	5.49	1241	0.34	1371	0.3756	1038	0.2844	97.65	15.31	0.92	0.09
Fenland	jianan.luan@mrc-epid.cam.ac.uk	16/01/2015	1	GWAS	W	Eu	759	45.42	7.16	26.69	5.47	346	0.456	242	0.319	171	0.225	87.06	12.67	0.84	0.06
Fenland	jianan.luan@mrc-epid.cam.ac.uk	16/01/2015	1	GWAS	M	Eu	600	44.53	7.41	27.59	3.93	153	0.255	318	0.53	129	0.215	98.78	11.67	0.94	0.07
Fenland	jianan.luan@mrc-epid.cam.ac.uk	16/01/2015	2	MC	W	Eu	1539	47	7	26.46	5.49	736	0.478	489	0.318	314	0.204	85.21	12.86	0.82	0.07
Fenland	jianan.luan@mrc-epid.cam.ac.uk	16/01/2015	2	MC	M	Eu	1372	47	7.19	27.05	4.11	456	0.332	637	0.464	279	0.203	96.55	11.24	0.93	0.07
Framingham (BMI)	nheard@bu.edu	2015-03-10	1	GWAS	O	Eu	7886	44.95	10.41	26.67	5.13	3246	0.414	2979	0.38	1615	0.206	91.38	14.97	0.88	0.1
Framingham (BMI)	nheard@bu.edu	2015-03-10	1	GWAS	W	Eu	4241	44.79	10.28	25.84	5.65	2292	0.5455	1139	0.2711	771	0.1835	85.48	15.12	0.81	0.07
Framingham (BMI)	nheard@bu.edu	2015-03-10	1	GWAS	M	Eu	3645	45.15	10.56	27.64	4.26	954	0.2622	18.4	0.5058	844	0.232	97.98	11.69	0.96	0.06
Framingham (WC)	nheard@bu.edu	2015-03-10	1	GWAS	O	Eu	6993	45.16	10.84	26.84	5.23	2799	0.4026	2630	0.3783	1524	0.2192	91.38	14.97	0.88	0.1
Framingham (WC)	nheard@bu.edu	2015-03-10	1	GWAS	W	Eu	3693	44.99	10.75	26	5.82	1968	0.538	970	0.2652	720	0.1968	85.48	15.12	0.81	0.07
Framingham (WC)	nheard@bu.edu	2015-03-10	1	GWAS	M	Eu	3300	45.32	10.93	27.78	4.3	831	0.2522	1660	0.5038	804	0.244	97.98	11.69	0.96	0.06
Framingham (WHR)	nheard@bu.edu	2015-03-10	1	GWAS	O	Eu	3171	51.17	9.9	26.82	4.88	1233	0.3902	1270	0.4019	657	0.2079	89.4	14.5	0.88	0.1
Framingham (WHR)	nheard@bu.edu	2015-03-10	1	GWAS	W	Eu	1670	51	9.77	26.08	5.54	877	0.528	471	0.2836	313	0.1884	82.02	13.64	0.81	0.07
Framingham (WHR)	nheard@bu.edu	2015-03-10	1	GWAS	M	Eu	1501	51.37	10.05	27.64	3.87	356	0.2375	799	0.533	344	0.2295	97.61	10.46	0.96	0.06
FUSION - controls	aujackso@umich.edu	2015-03-03	1	GWAS	W	Eu	446	61.86	7.18	27.16	4.17	151	0.339	196	0.44	99	0.222	86.17	10.92	0.84	0.062
FUSION - controls	aujackso@umich.edu	2015-03-03	1	GWAS	M	Eu	449	61.62	7.6	37.04	3.34	138	0.307	229	0.51	82	0.183	96.16	9.68	0.97	0.057
FUSION - T2D cases	aujackso@umich.edu	2015-03-03	1	GWAS	W	Eu	455	63.51	7.74	31.19	5.27	43	0.095	158	0.347	254	0.558	99	12.79	0.9	0.069
FUSION - T2D cases	aujackso@umich.edu	2015-03-03	1	GWAS	M	Eu	605	61.91	7.29	29.45	4.02	78	0.129	266	0.44	261	0.431	104.3	10.78	0.994	0.065
FUSION2 - controls	aujackso@umich.edu	2015-03-03	2	MC	W	Eu	373	56.38	12.33	27.02	4.88	139	0.373	145	0.389	89	0.239	84.97	11.7	0.825	0.069
FUSION2 - controls	aujackso@umich.edu	2015-03-03	2	MC	M	Eu	550	55.74	10.13	26.82	3.52	166	0.302	295	0.536	89	0.162	95.25	10	0.938	0.063
FUSION2 - T2D cases	aujackso@umich.edu	2015-03-03	2	MC	W	Eu	303	60.63	7.66	31.71	5.82	31	0.102	101	0.333	171	0.564	98.6	14.02	0.886	0.067
FUSION2 - T2D cases	aujackso@umich.edu	2015-03-03	2	MC	M	Eu	437	58.6	9.18	30.47	5.09	51	0.117	173	0.396	213	0.487	105.82	13.24	0.988	0.065
Generation Scotland	Jennifer.Huffman@nih.gov	2015-04-05	2	GWAS	O	Eu	9852	52.21	13.63	27.05	5.11	2447	0.3657	2706	0.4044	1539	0.23	90.3	13.84	0.87	0.09
Generation Scotland	Jennifer.Huffman@nih.gov	2015-04-05	2	GWAS	W	Eu	5782	51.92	13.52	26.86	5.59	1632	0.4133	1402	0.355	915	0.2317	86.19	13.65	0.83	0.09
Generation Scotland	Jennifer.Huffman@nih.gov	2015-04-05	2	GWAS	M	Eu	4070	52.62	13.78	27.32	4.29	815	0.2971	1304	0.4754	624	0.2275	96.24	11.82	0.93	0.07
GENOA	lfbielak@umich.edu	2015-03-30	1	GWAS	O	Eu	1118	58.99	10.14	30.78	6.26	175	0.1565	395	0.3533	548	0.4902	100.81	15.9	0.91	0.11
GENOA	lfbielak@umich.edu	2015-03-30	1	GWAS	W	Eu	629	58.64	10.2	30.8	7.03	132	0.2098	200	0.318	297	0.4722	95.82	16.36	0.85	0.08
GENOA	lfbielak@umich.edu	2015-03-30	1	GWAS	M	Eu	489	59.45	10.06	30.75	5.1	43	0.0879	195	0.3988	251	0.5133	107.22	12.69	0.99	0.09
GLACIER	shafqat.ahmad@med.lu.se	2015-03-09	2	MC	W	Eu	3474	49.07	8.79	25.51	4.38	1799	0.521	1175	0.34	478	0.138	86.72	11.89	NA	NA
GLACIER	shafqat.ahmad@med.lu.se	2015-03-09	2	MC	M	Eu	2266	49.86	8.31	26.07	3.41	897	0.397	1108	0.491	254	0.112	96.97	10.12	NA	NA
GOOD	joel.eriksson.2@gu.se	2015-03-29	2	GWAS	M	Eu	731	24.1	0.6	23.6	3.4	551	0.754	148	0.202	32	0.044	84.4	8.1	0.85	0.04
GOYA male obese cases	veertarun@gmail.com	2015-01-29	2	GWAS	M	Eu	670	43	6.2	35.5	5.5	5	0.0074	99	0.147	566	0.844	116.8	14.07	1.019	0.088
GOYA male non-obese controls (Genetics of Overweight Young Adults)				GWAS	M	Eu	786	47.7	8.5	26.1	3.6	312	0.3969	370	0.4707	102	0.1297	93.48	10.52	0.93	0.068
HAPI Old Order Amish	ssnitker@medicine.umaryland.edu	2015-04-24	1	GWAS	O	Eu	777	43.37	13.88	26.67	4.52	315	0.4054	302	0.3887	160	0.2059	87.39	11.01	0.85	0.08
Health2006	marie.harder@sund.ku.dk	2015-06-02	2	MC	W	Eu	1562	48.9	12.96	25.32	5.03	849	0.544	449	0.287	234	0.15	83.21	12.59	0.82	0.07
Health2006	marie.harder@sund.ku.dk	2015-06-02	2	MC	M	Eu	1284	50.46	12.7	26.62	4.17	484	37.7	574	0.447	224	0.174	95.38	12.09	0.94	0.07
HPFS-case	lu.qi@channing.harvard.edu	17/06/2015		GWAS	M	Eu	1093	55.54	8.53	27.73	4.02	271	0.249	538	0.496	276	0.254	101.81	10.91	0.96	0.05
HPFS-control	lu.qi@channing.harvard.edu	17/06/2015		GWAS	M	Eu	1278	55.47	8.37	25	2.73	679	0.535	524	0.413	67	0.052	94.37	8.31	0.94	0.06
HRS	smjenn@umich.edu	2015-04-02	2	GWAS	W	AA	870	66.24	10.43	31.61	6.98	147	0.169	226	0.26	497	0.571	101.99	15.32	NA	NA
HRS	smjenn@umich.edu	2015-04-02	2	GWAS	M	AA	494	67.03	9.69	28.78	5.38	129	0.261	174	0.352	191	0.387	102.48	13.27	NA	NA
HRS	smjenn@umich.edu	2015-04-02	2	GWAS	W	Eu	4725	68.25	10.78	28.65	6.25	1483	0.314	1547	0.327	1695	0.359	95.95	15.44	NA	NA
HRS	smjenn@umich.edu	2015-04-02	2	GWAS	M	Eu	3408	68.92	9.76	29.13	4.93	676	0.198	1443	0.423	1289	0.378	105.11	11.93	NA	NA
HUNT - controls	aujackso@umich.edu	2015-03-03	2	MC	M	Eu	318	62.23	14.86	26.62	3.41	99	0.311	177	0.557	42	0.132	93.39	8.89	0.915	0.059
HUNT - T2D cases	aujackso@umich.edu	2015-03-03	2	MC	W	Eu	149	68.22	13.03	30.22	5.21	23	0.154	50	0.336	76	0.51	93.78	11.98	0.86	0.064
HUNT - T2D cases	aujackso@umich.edu	2015-03-03	2	MC	M	Eu	241	65.86	11.31	28.24	3.88	53	0.22	112	0.465	76	0.315	98.58	9.88	0.944	0.063
HUNT- controls	aujackso@umich.edu	2015-03-03	2	MC	W	Eu	246	65.37	14.36	27.73	4.63	71	0.289	97	0.394	78	0.317	86.58	11.28	0.825	0.06
InCHIANTI	tanakato@mail.nih.gov	2015-08-10	1	GWAS	O	Eu	1106	67.57	15.07	27.23	4.15	352	0.319	487	0.4407	266	0.2407	91.42	11.15	0.87	0.07
InCHIANTI	tanakato@mail.nih.gov	2015-08-10	1	GWAS	W	Eu	611	68.21	15.07	27.37	4.68	146	0.2949	246	0.497	103	0.2081	94.59	9.34	0.87	0.07
InCHIANTI	tanakato@mail.nih.gov	2015-08-10	1	GWAS	M	Eu	495	66.77	15.04	27.06	3.39	206	0.3377	241	0.3951	163	0.2672	88.86	11.83	0.95	0.06
Inter99	marie.harder@sund.ku.dk	20/01/2015	2	MC	W	Eu	3027	45.91	7.89	25.75	5.07	1580	0.522	913	0.302	504	0.167	80.27	12.31	0.8	0.06
Inter99	marie.harder@sund.ku.dk	20/01/2015	2	MC	M	Eu	2893	46.63	7.72	26.82	4.02	988	0.342	1400	0.484	502	0.174	93.25	11.02	0.92	0.06
KORA S3	thomas.winkler@klinik.uni-regensburg.de	19.05.2015	1	GWAS	W	Eu	829	52.13	10.05	26.98	4.64	307	0.37	334	0.403	188	0.227	83.75	11.03	0.8	0.06
KORA S3	thomas.winkler@klinik.uni-regensburg.de	19.05.2015	1	GWAS	M	Eu	813	52.96	10.09	27.69	3.45	160	0.197	485	0.597	168	0.207	97.07	9.71	0.93	0.06
KORA S3	thomas.winkler@klinik.uni-regensburg.de	19.05.2015	2	MC	W	Eu	659	41	12.67	25.18	4.72	387	0.587	173	0.263	98	0.149	79.12	11.24	0.78	0.06
KORA S3	thomas.winkler@klinik.uni-regensburg.de	19.05.2015	2	MC	M	Eu	599	40.69	13.12	26.54	3.43	207	0.346	305	0.509	87	0.145	92.8	9.33	0.9	0.06
KORA S4	thomas.winkler@klinik.uni-regensburg.de	19.05.2015	1	GWAS	W	Eu	928	53.62	8.79	27.49	5.07	335	0.361	338	0.364	254	0.274	86.64	12.16	0.82	0.06
KORA S4	thomas.winkler@klinik.uni-regensburg.de	19.05.2015	1	GWAS	M	Eu	883	54.22	8.92	27.99	3.91	167	0.189	493	0.558	223	0.253	99.01	10.22	0.94	0.06
KORA S4	thomas.winkler@klinik.uni-regensburg.de	19.05.2015	2	MC	W	Eu	622	41.42	14.93	25.95	5.09	293	0.471	222	0.357	107	0.172	82.17	12.02	0.79	0.06
KORA S4	thomas.winkler@klinik.uni-regensburg.de	19.05.2015	2	MC	M	Eu	581	42.56	15.75	26.64	3.59	197	0.339	295	0.508	89	0.153	94.34	10.01	0.9	0.06
LOLIPOP_EW610_F	weihua.zhang@imperial.ac.uk	2015-01-19	2	GWAS	W	Eu	249	55.66	9.7	26.65	5.1	110	0.442	86	0.345	53	0.213	88.32	13.6	0.86	0.09
LOLIPOP_EW610_M	weihua.zhang@imperial.ac.uk	2015-01-19	2	GWAS	M	Eu	678	56.07	9.84	27.8	4.44	186	0.274	325	0.479	167	0.246	98.42	11.61	0.94	0.06
LOLIPOP_IA317_M	weihua.zhang@imperial.ac.uk	2015-01-19	2	GWAS	M	As	2121	48.26	10.47	26.83	4.31	735	0.347	977	0.461	409	0.193	97.07	11.68	0.96	0.07
LOLIPOP_IA610_CASE_F	weihua.zhang@imperial.ac.uk	2015-01-19	2	GWAS	W	As	412	61.65	9	29.89	5.69	78	0.19	157	0.382	176	0.428	100.5	12.53	0.95	0.08
LOLIPOP_IA610_CASE_M	weihua.zhang@imperial.ac.uk	2015-01-19	2	GWAS	M	As	2011	58.71	9.68	27.14	4.13	628	0.313	973	0.484	407	0.203	99.02	11.2	0.98	0.07
LOLIPOP_IA610_CONTROL_F	weihua.zhang@imperial.ac.uk	2015-01-19	2	GWAS	W	As	618	53.65	9.25	27.97	4.9	164	0.265	282	0.456	172	0.278	94.61	12.19	0.91	0.09
LOLIPOP_IA610_CONTROL_M	weihua.zhang@imperial.ac.uk	2015-01-19	2	GWAS	M	As	3516	53.04	10.64	26.68	4	1166	0.332	1708	0.486	638	0.182	97.21	10.68	0.96	0.07
LURIC CASES	graciela.delgado@medma.uni-heidelberg.de	27/02/2015	2	GWAS	W	Eu	566	66.28	9.74	27.19	4.61	189	0.334	231	0.408	146	0.258	94.46	13.14	0.91	0.08
LURIC CASES	graciela.delgado@medma.uni-heidelberg.de	27/02/2015	2	GWAS	M	Eu	1754	63.07	9.76	27.54	3.7	467	0.266	896	0.511	391	0.223	101.11	10.67	0.99	0.06
LURIC CONTROLS	graciela.delgado@medma.uni-heidelberg.de	27/02/2015	2	GWAS	W	Eu	284	62.2	10.91	27.51	4.83	92	0.324	123	0.433	69	0.243	93.62	12.57	0.89	0.08
LURIC CONTROLS	graciela.delgado@medma.uni-heidelberg.de	27/02/2015	2	GWAS	M	Eu	320	54.73	12.42	27.41	3.71	87	0.272	169	0.528	64	0.2	99.51	10.91	0.97	0.07
MEC CASES				MC	O	Af	351	68.36	8.21	31.55	6.67	44	0.125356	121	0.344729	185	0.527066	103.69	15.15	0.908	0.1
MEC CASES				MC	W	Af	252	67.66	8.11	32.24	6.99	32	0.126984	78	0.309524	141	0.559524	103.09	15.7	0.889	0.101
MEC CASES				MC	M	Af	99	70.15	8.22	29.79	5.4	12	0.121212	43	0.434343	44	0.444444	105.26	13.59	0.961	0.0776
MEC CONTROLS				MC	O	Af	1170	68.97	8.48	28.57	6.32	334	0.28547	443	0.378632	383	0.32735	94.9	14.68	0.873	0.113
MEC CONTROLS				MC	W	Af	940	68.51	8.56	29	6.57	257	0.273404	339	0.360638	337	0.358511	94.42	15.17	0.857	0.112
MEC CONTROLS				MC	M	Af	230	70.83	7.9	26.85	4.82	77	0.334783	104	0.452174	46	0.2	96.82	12.42	0.9384	0.09
MESA				GWAS	W	Eu	1398	62.7	10.2	27.6	5.9	534	0.384	466	0.335	391	0.281	95.5	16.5	0.89	0.09
MESA				GWAS	M	Eu	1280	62.8	10.1	28	4.2	312	0.244	610	0.477	357	0.279	101.2	11.6	0.96	0.07
METSIM - controls	aujackso@umich.edu	2015-03-03	2	MC	M	Eu	916	53.95	4.96	26.39	3.38	319	0.348	478	0.522	119	0.13	95.79	9.67	0.954	0.059
METSIM - T2D cases	aujackso@umich.edu	2015-03-03	2	MC	M	Eu	1162	60.51	6.64	30.18	5.17	152	0.131	488	0.42	522	0.449	107.19	13.32	1.019	0.069
NESDA	w.peyrot@ggzingeest.nl	2015-02-14	1	GWAS	W	Eu	1211	40.81	12.6	25.34	5.28	683	0.564	311	0.257	204	0.168	85.57	13.29	0.824	0.074
NESDA	w.peyrot@ggzingeest.nl	2015-02-14	1	GWAS	M	Eu	586	43.74	11.98	26.2	4.32	249	0.425	234	0.4	99	0.169	96.31	12.62	0.919	0.076
NTR	eco.degeus@vu.nl	2015-01-30	1	GWAS	W	Eu	2457	44.5	15	24.2	4.46	1609	0.655	642	0.261	206	0.084	82.4	12.5	0.8	0.08
NTR	eco.degeus@vu.nl	2015-01-30	1	GWAS	M	Eu	1254	49.7	15.6	25.2	3.5	650	0.518	501	0.4	103	0.082	93.5	12.6	0.89	0.08
NFBC66				GWAS	W	Eu	2428	31	0	24.14	4.58	1660	0.6837	539	0.222	229	0.0943	73.46	23.78	0.82	0.09
NFBC66				GWAS	M	Eu	2246	31	0	25.17	3.61	1184	0.5272	873	0.3887	189	0.0841	88.21	12.3	0.91	0.06
NFBC66				GWAS	O	Eu	4674	31	0	24.63	4.17	2844	0.6085	1412	0.3021	418	0.0894	80.55	20.51	0.86	0.09
NHS-case	lu.qi@channing.harvard.edu	17/06/2015		GWAS	W	Eu	1127	53.57	6.67	29.63	5.59	283	0.215	467	0.356	562	0.428	89.89	13.05	0.83	0.14
NHS-control	lu.qi@channing.harvard.edu	17/06/2015		GWAS	W	Eu	1124	53.24	6.69	25.09	4.7	915	0.58	465	0.295	197	0.125	78.59	11.12	0.77	0.07
NSHD	jianan.luan@mrc-epid.cam.ac.uk	2015-06-05	2	MC	W	Eu	1213	53	0	27.35	5.23	454	0.374	459	0.378	300	0.247	85.59	12.53	0.81	0.07
NSHD	jianan.luan@mrc-epid.cam.ac.uk	2015-06-05	2	MC	M	Eu	1215	53	0	27.36	3.93	340	0.28	611	0.503	264	0.217	97.64	10.43	0.94	0.06
NSPHS	asa.johansson@igp.uu.se	2015-04-07	1	GWAS	O	Eu	593	49.93	19.32	26.89	4.73	229	0.3862	243	0.4098	118	0.199	NA	NA	NA	NA
NSPHS	asa.johansson@igp.uu.se	2015-04-07	1	GWAS	M	Eu	279	50.63	19.24	27.2	4.41	87	0.3118	134	0.4803	58	0.2079	NA	NA	NA	NA
NSPHS	asa.johansson@igp.uu.se	2015-04-07	1	GWAS	W	Eu	314	49.31	19.4	26.4	4.98	142	0.4522	109	0.3471	60	0.1911	NA	NA	NA	NA
ORCADES	Jennifer.Huffman@nih.gov	2015-04-22	1	GWAS	O	Eu	889	53.49	15.73	27.67	4.84	257	0.2975	377	0.4363	230	0.2662	93.51	13.88	0.91	0.09
ORCADES	Jennifer.Huffman@nih.gov	2015-04-22	1	GWAS	W	Eu	485	52.71	15.71	27.34	5.31	177	0.375	175	0.3708	120	0.2542	89	13.6	0.86	0.08
ORCADES	Jennifer.Huffman@nih.gov	2015-04-22	1	GWAS	M	Eu	404	54.43	15.73	28.07	4.19	80	0.2041	202	0.5153	110	0.2806	98.92	12.19	0.96	0.07
QFS	christian.couture@kin.ulaval.ca	2015-01-28	2	GWAS	O	Eu	881	42.78	16.76	27.72	7.7	398	0.452	244	0.277	239	0.271	88.95	18.44	0.86	0.1
QFS	christian.couture@kin.ulaval.ca	2015-01-28	2	GWAS	W	Eu	503	42.96	17.03	27.93	8.53	242	0.481	113	0.225	148	0.294	84.93	18.74	0.8	0.08
QFS	christian.couture@kin.ulaval.ca	2015-01-28	2	GWAS	M	Eu	378	42.56	16.42	27.44	6.44	156	0.413	131	0.347	91	0.241	94.1	16.7	0.93	0.08
RISC				GWAS	O	Eu	1087	43.9	8.3	25.4	4	547	0.503	393	0.362	130	0.12	86.2	12.8	0.86	0.1
Rotterdam Study				GWAS	O	Eu	3666	69.4	9.1	26.3	3.7	2192	0.367	2702	0.452	823	0.138	90.563	11.18	0.9052	0.09221
Rotterdam Study				GWAS	W	Eu	1457	68.1324	8.15597	25.682	2.99	976	0.4021	1208	0.4977	174	0.071	94.334	9.5176	0.9568	0.0762
Rotterdam Study				GWAS	M	Eu	2209	70.32	9.599	26.733	4.0585	1216	0.3402	1494	0.418	649	0.1815	87.897	11.5025	0.8686	0.08816
Sardinia				GWAS	M	Eu	432	64.14	11.33	28.05	3.71	85	0.1967	203	0.4699	109	0.252	97.21	9.92	0.97	0.06
Sardinia				GWAS	W	Eu	513	60.31	10.89	27.38	4.78	168	0.327	194	0.3781	126	0.245	86.19	11.18	0.85	0.07
SHIP	ateumer@uni-greifswald.de	2015-02-18	1	GWAS	W	Eu	2055	48.56	16.02	26.92	5.31	846	0.412	658	0.32	533	0.259	83.15	12.99	0.8	0.06
SHIP	ateumer@uni-greifswald.de	2015-02-18	1	GWAS	M	Eu	1991	50.79	16.41	27.68	4.05	511	0.257	979	0.492	501	0.252	95.79	11.68	0.93	0.06
SORBS	reedik.magi@ut.ee	2105-03-30	1	GWAS	O	Eu	1020	48.62	16.28	26.94	4.92	326	0.3679	355	0.4007	205	0.2314	90.84	13.85	0.87	0.1
SORBS	reedik.magi@ut.ee	2105-03-30	1	GWAS	W	Eu	586	48.82	16.06	26.86	5.48	219	0.4277	161	0.3145	132	0.2578	87.04	13.82	0.83	0.08
SORBS	reedik.magi@ut.ee	2105-03-30	1	GWAS	M	Eu	434	48.35	16.6	27.05	4.02	107	0.2861	194	0.5187	73	0.1952	96.07	12.08	0.94	0.08
TRAILS	p.j.van.der.most@umcg.nl	2015-01-26	2	GWAS	W	Eu	559	18.95	0.56	23.03	3.73	417	0.746	97	0.174	31	0.055	75.23	8.68	0.75	0.05
TRAILS	p.j.van.der.most@umcg.nl	2015-01-26	2	GWAS	M	Eu	443	19.01	0.54	22.46	3.67	354	0.799	46	0.104	24	0.054	81.57	9.53	0.82	0.05
TwinsUK	lydia.quaye@kcl.ac.uk	2015-02-20	1	GWAS	W	Eu	2044	58.3	12.87	25.31	4.51	1083	0.5298	655	0.3205	273	0.1336	80.62	11.14	0.79	0.07
WGHS	aychu@partners.org	2014-10-02	1	GWAS	W	Eu	22887	54.69	7.11	25.91	4.96	11702	0.511	7061	0.308	4001	0.175	88.87	14.32	0.83	0.08
WHI Pilot (African Ancestry)	rohde@unc.edu	2005-03-31	2	MC	W	Af	2002	61.03	6.88	31.34	6.82	327	0.1633	658	0.3287	1017	0.508	91.82	14.03	0.82	0.07
WHI YR3/YR4 (African Ancestry)	rohde@unc.edu	2005-03-31	2	MC	W	Af	3050	61.35	7.34	31.46	6.8	476	0.1561	954	0.3128	1620	0.5311	92.55	14.51	0.83	0.09
Whitehall	jianan.luan@mrc-epid.cam.ac.uk	2015-01-16	2	MC	W	Eu	697	60.95	6.11	27.09	5.64	275	0.395	250	0.359	172	0.247	83.6	13.24	0.81	0.07
Whitehall	jianan.luan@mrc-epid.cam.ac.uk	2015-01-16	2	MC	M	Eu	2337	60.65	5.91	26.63	3.68	790	0.338	1174	0.502	373	0.16	94.38	10.51	0.94	0.07
YFS	leo-pekka.lyytikainen@uta.fi	22/6/2015	2	GWAS	W	Eu	1081	37.77	4.98	25.32	5.03	594	0.549	305	0.282	171	0.158	83.52	12.62	0.83	0.07
YFS	leo-pekka.lyytikainen@uta.fi	22/6/2015	2	GWAS	M	Eu	908	37.69	5.03	26.76	4.29	330	0.363	407	0.448	169	0.186	94.44	11.99	0.94	0.07
