# Supplementary material for: Genome-wide physical activity interactions in adiposity ― A meta-analysis of 200,452 adults
Source: PLoS Genet. 2017 Apr 27;13(4):e1006528. doi: 10.1371/journal.pgen.1006528 (PMC5407576; doi:10.1371/journal.pgen.1006528)
Supplement: S6 Table — (XLSX) [file pgen.1006528.s011.xlsx]

## Sheet: TS6. Methods_for_PA_bystudy
Supplementary Table 6 - Methods used for measuring physical activity and definitions of inactive for studies participating in the meta-analyses.
Study	PA measurement	PA measure used to define physical inactivity	Definition of physical inactivity
AGES-Reykjavik	Interviewer-administered questionnaire	The following question was used: In the past 12 months, how often did you participate in moderate or vigorous physical activities?	Never or rarely participation in moderate or vigorous physical activities
ARIC	Self-administered questionnaire	Total habitual PA score	20% of men and 20% of women with lowest age-adjusted PA for each ethnicity separately
B58C	Self-administered questionnaire	Total PA in MET hours/week	20% of men and 20% of women with lowest age-adjusted PA
BUSSELTON	Self-administered questionnaire	The following variables were used (hourrs of PA/week): 1. Vigorous activity at work; 2) Vigorous activity at home; 3) Vigorous leisure activity; 4) Moderate activity at work; 5) Moderate activity at home; 6) Moderate leisure activity	Both of the following conditions required: The sum of 1, 2 and 3 = 0 the sum of 4, 5 and 6 = 0-3 h/wk
CARDIA	Self-administered questionnaire	Total leisure-time physical activity in Exercise Units	20% of men and 20% of women with lowest age-adjusted PA
CLHNS	Self-administered questionnaire	A) MET-minutes calculated by summing all individual activities during 24 hours of a typical day; B) MET-minutes calculated after grouping together similar tasks (e.g. personal hygiene)	Women with PA in the lowest 20% of population when measured with both A and B. Women with PA in the lowest 40% of A or B but with PA in the lowest 20% of the other
CoLaus	Self-administered questionnaire	The following questions were used: 1) How much time (in minutes) do you walk every day on average to get to work, shops?; 2) During working hours does your occupation involve: a) most often sitting, b) often standing, but little or no carrying or lifting of heavy loads, c) most often walking around and carrying light loads, d) important physical load, carrying heavy loads; 3) How many times per w…	All of the following responses required: 1) <20 minutes of walking/day 2) 'Most often sitting' or 'Often standing, but little or no carrying or lifting of heavy loads' in occupation 3) Less than once a week of participation in at least 20 minutes of leisure PA
FINRISK (COROGENE CONTROLS)	Self-administered questionnaire	The following questions were used: 1) How much physical effort does your job take? 2) How active are you during leisure-time? 3) How many minutes per day do you walk or cycle to work?	All of the following responses required: 1) Mostly sitting during work 2) Reading, watching TV or do other activities that do not require physical effort during leisure-time 3) less than 15 min/day
DESIR	Self-administered questionnaire	Number of times person was involved in structured PA per week	0-1 times/week of structured PA
DR's EXTRA	Self-administered questionnaire	Total time of leisure time PA per week	20% of men and 20% of women with lowest age-adjusted PA
EGCUT	Self-administered questionnaire	The following questions were used: 1) How much physical effort does your current job take? 2) Hours per week used for moderate-to-vigorous intensity leisure-time physical activities	Both of the following responses required: 1) Most of the time I am sitting 2) <1 h/wk of moderate-to-vigorous intensity leisure-time physical activities
EPIC-Norfolk	Self-administered questionnaire	Cambridge Physical Activity Index (four categories: inactive, moderately inactive, moderately active, active)	Inactive category
ERF	Self-administered questionnaire	The following questions were used: 1) How would you describe the physical intensity of your work (light, fairly heavy, heavy or very heavy)? 2) How often do you practice sports with sweating or getting short of breath? 3) How often do you practice sports with slight sweating or slight increase in heart rate or breathing?	All of the following responses required: 1) Light intensity of work 2) Never or sometimes sports with sweating or getting short of breath 3) Never, sometimes, or less than 1 h/wk of sports with slight sweating or slight increase in heart rate or breathing
FamHS	Interviewer-administered questionnaire	MET-minutes of leisure-time PA per week	20% of men and 20% of women with lowest age-adjusted PA
Fenland	Combined heart rate and movement measurement (Actiheart)	Physical activity level (PAL = total daily energy expenditure / resting energy expenditure)	20% of men and 20% of women with lowest age-adjusted PA
Framingham Heart Study	Interviewer-administered questionnaire	Framingham PA score	20% of men and 20% of women with lowest age-adjusted PA score
FUSION 1 and 2	Self-administered questionnaire	The following questions were used: 1) How strenuous is your work? 2) How much do you exercise or exert yourself in your spare time? 3) How many minutes do you walk, ride on a bicycle or otherwise exercise to get to work?	Both of the following responses required: 1) 'Light deskwork', 'other work sitting down', or 'not working' 2) In my spare time I read, watch TV, and work in the household with tasks which don't make me move much or physically tax me 3) <15 minutes daily
Generation Scotland	Self-administered questionnaire	A summary measure was calculated for total moderate-to-vigorous PA min/wk as follows: 'Time spent walking' + 'Time doing moderate activities' + 2 x 'Time doing vigorous activities'	20% of men and 20% of women with lowest age-adjusted PA
GENOA	Self-administered questionnaire	The following question was used: Based on your typical 24 hour day, what is the average number of hours you spend per day in : 1) heavy activity 2) moderate activity	Both of the following responses required: 1) 0 hours/day in heavy activity 2) 0 or 1 hours/day in moderate activity
GLACIER	Self-administed questionnaire (Umeå EPIC Questionnaire)	Frequency of structured exercise (coded as exercise never/rarely vs. one or more times weekly)	Exercise never/rarely
GOOD	Self-administered questionnaire	The following questions were used to define physical activity: 1. How strenuous is your work (sitting, light, standing medium, standing heavy, light with movements, medium with movements, heavy with movements) 2. How much time spent on recreational PA (hrs per week)	Both of the following responses required: 1) 'Sitting' or 'light labour' in work 2) No participation in recreational PA
GOYA MALE	Self-administered questionnaire	Level of PA defined by the following categories: 1) Being almost entirely inactive or engaging in light PA less than 2 hours/week 2) Engaging in light PA 2-4 hours/week 3) Engaging in light PA more than 4 hours/week or in vigorous PA 2-4 hours/week 4) engaging in highly vigorous PA more than 4 hours/week or regular heavy exercise or competitive sports several times per week	Being almost entirely inactive or engaging in light PA less than 2 hours/week
HAPI Heart	Accelerometer (Actical ver. 8.2 or 8.3 worn seven full days)	Average number of accelerometer counts per minute	20% of men and 20% of women with lowest age-adjusted PA
Health06	Self-administered questionnaire	A combined PA score: (three categories: physically passive, light or medium physically active, hard or very hard physically active)	Physically passive category
HPFS	Self-administered questionnaire	MET-hours of PA per week	20% of men and 20% of women with lowest age-adjusted PA
Health & Retirement Study	Interviewer-administered questionnaire	The following questions were used: 1) How often do you participate in vigorous PA? 2) How often do you participate in moderate PA?	Response 'hardly ever or never' to both questions
HUNT	Self-administered questionnaire	The following variables were used: 1) Average of hours of low PA per week in the last year 2) Average of hours of vigorous PA per week in the last year	Both of the following values required: 1) <1 hour per week 2) <1 hour per week
InCHIANTI	Self-administered questionnaire	The following question was used: What was your physical activity level last year (hardly any physical activity, mostly sitting/some walking, light exercise 2-4 h/wk, moderate 1-2 h/wk or light exercise >4 h/wk, or moderate exercise > 3 h/wk)?	Hardly any PA or Mostly sitting/some walking
Inter99	Self-administered questionnaire	A combined PA score: (three categories: physically passive, light or medium physically active, hard or very hard physically active)	Physically passive category
KORA3 and 4	Self-administered questionnaire	The following questions were used: 1. How often do you carry out sports in the winter 2. How often do you carry out sports in the summer 3. How would you classify your work or main employment	All of the following responses required: 1) 'Less than 1 hour per week' or 'No sporty activity in winter' 2) 'Less than 1 hour per week' or 'No sporty activity in summer' 3) 'No appreciable physical work'
KORCULA	Self-administered questionnaire	The following questions were used: 1) PA during your every day's work 2) PA during the remainder of the day/leisure-time	Both of the following responses required: 1) 'Sitting or light' 2) 'Sitting or light'
LOLIPOP	Interviewer-administered questionnaire	Physical Activity Index Nomogram (1=very sedentary, 2=sedentary, 3=somewhat active, 4=active, 5=very active)	Physical Activity Index = 1
LURIC	Self-administered questionnaire	Self-rated PA on a scale ranging from 1 ('bed rest') to 11 ('extremely sporty')	Categories 1 to 4
MEC	Self-administered questionnaire	Total leisure-time PA in MET-min/wk	20% of men and 20% of women with lowest age-adjusted PA
MESA	Self-administered questionnaire	Moderate-to-vigorous intensity PA in MET-hr/wk	20% of men and 20% of women with lowest age-adjusted PA
METSIM	Self-administered questionnaire	The following variables were used: 1) Exercise at work 2) Exercise at leisure-time	Both of the following responses required: 1) 'light sedentary work', 'sedentary work', or 'retired, unemployed, etc.' 2) 'a little or none' or 'physical exercise in context of other hobbies or physical exercise occasionally'
MRC Ely	Heart rate sensor	Physical Activity Level (total daily energy expenditure divided by resting energy expenditure)	20% of men and 20% of women with lowest age-adjusted PA
NESDA	Self-administered questionnaire	MET-min per week of total PA	20% of men and 20% of women with lowest age-adjusted PA
NFBC66	Self-administered questionnaire	Moderate-to-vigorous PA in MET-min/wk	20% of men and 20% of women with lowest age-adjusted PA
NHS	Self-administered questionnaire	Total leisure-time PA in MET-min/wk	20% of men and 20% of women with lowest age-adjusted PA
NSHD	Self-administered questionnaire	Level of PA defined by participation in any sports, vigorous leisure activities or exercise in study member's spare time, not including getting to and form work in the past 4 weeks and the number of occasions on which these activities were reported: 1) Inactive (no reported participation in relevant activities); 2) Moderately active (participation in relevant activities one to four times); 3) Mos…	Response 1
NSPHS	Self-administered questionnaire	Leisure Activity Scale	20% of men and 20% of women with lowest age-adjusted PA
NTR	Self-administered questionnaire	Total leisure-time PA in MET-h/wk	20% of men and 20% of women with lowest age-adjusted PA
ORCADES	Self-administered questionnaire	The following questions were used: 1) Activity level in main job 2) Time used to travel from home to job by bicycle/walk 3) General activity level outside of work	All of the following responses required: 1) 'Mostly sitting down' or 'Not working' 2) <1 h/wk 3) 'Light' both in summer and winter
QFS	Bouchard 3-day physical activity diary	Total daily activity level	20% of men and 20% of women with lowest age-adjusted PA
QIMR	Self-administered questionnaire	Five-categorical PA scale	Category: 'No leisure exercise or sport'
RISC	Accelerometer (Actigraph)	Mean number of accelerometer counts per minute	20% of men and 20% of women with lowest age-adjusted PA
Rotterdam Study 1	Self-administered questionnaire	Participation in moderate-to-vigorous PA ≥20 min/wk	<20 min/wk of moderate-to-vigorous PA
Sardinia	Self-administered questionnaire	The following questions were used: 1) Do you practice sport (yes/no/don't know) 2) Do you walk habitually (yes/no/don't know)	Response = 'no' to both questions'
SHIP	Self-administered questionnaire	The following variables were used: 1) Activity during main occupation 2) Sporting activities in the summer 3) Sporting activities in the winter	All of the following responses required: 1) 'Mainly sitting' or 'mainly standing' 2) <1 h/wk of sporting activities in the summer 3) <1 h/wk of sporting activities in the winter
SORBS	Self-administered questionnaire	The following questions were used: 1) PA at work 2) Sports in leisure	Both of the following responses required: 1) 'Mostly sitting', 'Unemployed' or 'Retired' 2) 'Never/seldom'
TRAILS	Self-administered questionnaire	Total time of PA per week	20% of men and 20% of women with lowest age-adjusted PA
TwinsUK	Self-administered questionnaire	The following questions were used: 1) During the last 12 months, how would you describe the kind of physical activity at work? 2) In the past year, how frequently have you typically engaged in physical exercise that raise your heart rate and last for 20 minutes at a time?'	Inactive' or 'light' PA at work and less than once a month physical exercise that raised heart rate and lasted for 20 minutes at a time
VIS	Self-administered questionnaire	The following questions were used: 1) PA during your every day's work 2) PA during the remainder of the day/leisure-time	Both of the following responses required: 1) 'Sitting or light' 2) 'Sitting or light'
WGHS	Self-administered questionnaire	MET-hours of PA per week	20% of men and 20% of women with lowest age-adjusted PA
WHI	Self-administered questionnaire	MET-hours of recreational PA per week	20% of women with lowest age-adjusted PA
WHITEHALL	Self-administered questionnaire	MET-hours of total PA per week	20% of men and 20% of women with lowest age-adjusted PA
YFS	Self-administered questionnaire	The following questions were used: 1) How physically heavy is your work? 2) How often do you engage in rigorous PA?	Both of the following responses required: 1) 'unemployed' or 'light sit-down work' 2) 'not at all' or 'once a month or more'
MET, metabolic equivalent; PA, physical activity
