# Supplementary material for: Genome-wide physical activity interactions in adiposity ― A meta-analysis of 200,452 adults
Source: PLoS Genet. 2017 Apr 27;13(4):e1006528. doi: 10.1371/journal.pgen.1006528 (PMC5407576; doi:10.1371/journal.pgen.1006528)
Supplement: S10 Table — (XLSX) [file pgen.1006528.s015.xlsx]

## Sheet: TS10. WC_AllAncestry
Supplementary Table 10 - All SNPs that met significance for Waist circumference adjusted for BMI in the all ancestry analyses for at least one of the approaches tested: interaction, adjusted for physical activity, or jointly accounting for the main and interaction effects.a
											ACTIVE																		INACTIVE																		Main and Interaction Effects
											WOMEN						MEN						COMBINED						WOMEN						MEN						COMBINED						WOMEN (Nmax= 83706)
Locus	SNP	Chr	Pos(hg19)	Nearest Gene	Novel (Yes/No)	SNP adjusted for Pab	SNP Joint 2dfc	Waist-increasing allele	Waist-increasing allele		N	EAF	Beta	SE	P		N	EAF	Beta	SE	P		N	EAF	Beta	SE	P		N	EAF	Beta	SE	P		N	EAF	Beta	SE	P		N	EAF	Beta	SE	P		PadjPA	BetaadjPA	SEadjPA
1	rs9435732	1	17308158	MFAP2	No	All,M,W	All,M,W	C	T		63433.4	0.7221	0.0386	0.0066	5.91e-09		58975.4	0.7293	0.0429	0.0067	1.58e-10		140507	0.7301	0.0324	0.0046	1.65e-12		20122.8	0.7284	0.0309	0.0121	0.01073		21518.8	0.7356	0.0346	0.0116	0.002888		47248.4	0.7357	0.0281	0.0079	0.000395		6.89e-10	0.0357	0.0058
1	rs3738814	1	17331676	ATP13A2	No	All,M,W	All,M,W	A	G		62882.8	0.5275	0.0375	0.006	3.71e-10		58434.8	0.5461	0.0372	0.006	6e-10		139590	0.5412	0.027	0.0041	5.13e-11		18627.6	0.5257	0.0192	0.0111	0.08434		20027.6	0.5271	0.0212	0.0106	0.04502		44762.1	0.5356	0.0222	0.0071	0.001846		8.47e-10	0.032	0.0052
2	rs3790606	1	113052186	WNT2B*	Yes	M		G	C		62746	0.6341	0.0257	0.0069	0.0001843		58300	0.6597	0.0274	0.007	7.94e-05		139130	0.6473	0.0156	0.0048	0.001302		19813.8	0.6374	0.0506	0.0126	5.65e-05		21214.8	0.663	0.0496	0.0122	4.47e-05		46564.2	0.6515	0.0275	0.0082	0.0007895		1.13e-07	0.0323	0.0061
3	rs12731372	1	118852975	SPAG17	No	All,M,W	All,M,W	C	T		63431.5	0.7693	0.0398	0.0071	1.84e-08		58972.5	0.7627	0.0442	0.007	3.01e-10		140497	0.766	0.0325	0.0048	1.76e-11		20118.9	0.7683	0.0357	0.0129	0.005716		21470.9	0.7578	0.033	0.0122	0.006914		47200.6	0.7625	0.0391	0.0083	2.41e-06		1.17e-09	0.0377	0.0062
4	rs10923724	1	119546842	TBX15	No	All,M,W	All,M,W	T	C		62503.7	0.5619	0.0416	0.006	4.02e-12		58045.7	0.5755	0.0389	0.0061	1.67e-10		138677	0.5653	0.0385	0.0041	4.69e-21		18535.9	0.556	0.0362	0.0112	0.001265		19931.9	0.545	0.0239	0.0107	0.02497		44508.8	0.5507	0.0309	0.0072	1.54e-05		6.41e-14	0.0394	0.0053
5	rs11205303	1	149906413	MTMR11	No	All,M,W	All	C	T		61649	0.3651	0.0326	0.007	2.97e-06		58614	0.3765	0.0314	0.0068	4.38e-06		138363	0.3753	0.0309	0.0047	3.78e-11		19386.8	0.371	0.0321	0.0125	0.01003		21119.8	0.373	0.0403	0.0115	0.0004752		46065.2	0.3788	0.0331	0.0079	2.56e-05		3.17e-08	0.0337	0.0061
6	rs1894633	1	172331059	DNM3	No	All	All	G	A		62858.5	0.3625	0.0204	0.0062	0.0009672		58400.5	0.344	0.0189	0.0063	0.002713		139540	0.3521	0.0271	0.0044	5.02e-10		18618.8	0.362	0.0138	0.0116	0.2358		20014.8	0.3318	0.0158	0.0114	0.1659		44714.5	0.3432	0.025	0.0076	0.001016		0.001281	0.0175	0.0054
7	rs1046934	1	184023529	C1orf19	No	All	All	C	A		62657.3	0.3483	0.0165	0.0064	0.009342		58199.3	0.3567	0.0181	0.0064	0.004732		139108	0.3497	0.0225	0.0043	2.09e-07		18494.8	0.3446	0.0426	0.0119	0.000359		19891.8	0.3519	0.0437	0.0112	9.13e-05		44410.6	0.3493	0.0378	0.0076	6.67e-07		9.76e-05	0.0217	0.0056
8	rs10482795	1	218605609	TGFB2,LYPLAL1	No	All	All	A	G		44959.6	0.3131	0.0385	0.0076	3.89e-07		45015.6	0.2976	0.0394	0.0075	1.25e-07		110691	0.3004	0.0283	0.005	1.41e-08		13381.9	0.3088	0.004	0.0141	0.7754		16156.9	0.3092	0.0209	0.0125	0.09444		35442.8	0.3036	0.0144	0.0085	0.09121		6.33e-06	0.0302	0.0067
9	rs2044148	2	24737833	ITSN2	No	All		A	G		60654.8	0.2064	0.0201	0.0076	0.008068		56201.8	0.2109	0.0237	0.0076	0.00175		134150	0.2072	0.0207	0.0052	6.5e-05		18054	0.2035	0.0447	0.0141	0.001542		19391	0.197	0.0403	0.0137	0.003137		43361.9	0.2001	0.0323	0.0091	0.0003817		8.7e-05	0.0262	0.0067
9	rs11694842	2	25482970	DNMT3A	No	All	All	A	G		42220.6	0.6754	0.0314	0.0078	6.37e-05		42265.6	0.672	0.037	0.0076	1.08e-06		104422	0.6728	0.0307	0.0051	1.73e-09		11413.9	0.6744	0.0335	0.0153	0.02867		14127.9	0.6827	0.0371	0.0134	0.005774		31701.7	0.6776	0.026	0.009	0.003936		1.43e-05	0.0305	0.007
10	rs6715793	2	33379263	LTBP1	No		All	T	C		60620.7	0.4845	0.0258	0.0061	2.21e-05		56162.7	0.501	0.0243	0.0061	7.42e-05		134082	0.4932	0.0205	0.0042	1.12e-06		18117.9	0.4801	0.0237	0.0114	0.03757		19513.9	0.4697	0.0352	0.0109	0.001282		43498.8	0.4794	0.0237	0.0073	0.001132		1.17e-05	0.0234	0.0053
11	rs3791679	2	56096892	EFEMP1	No	All,M,W	All,M,W	A	G		60668.7	0.7555	0.0444	0.0073	1.04e-09		56135.7	0.7608	0.0468	0.0072	8.23e-11		134093	0.7579	0.0333	0.0049	1.52e-11		18087.9	0.7576	0.0567	0.0134	2.31e-05		19424.9	0.7519	0.0519	0.0123	2.62e-05		43392.8	0.7553	0.033	0.0084	9.18e-05		3.43e-13	0.0465	0.0064
11	rs3791675	2	56111309	EFEMP1	No	All,M,W	All,M,W	C	T		61225.9	0.7497	0.0441	0.0071	5.31e-10		56692.9	0.7555	0.0455	0.0071	1.56e-10		135017	0.7531	0.0325	0.0048	2.08e-11		19625	0.7526	0.0554	0.0127	1.22e-05		20914	0.75	0.0496	0.0118	2.76e-05		45929.9	0.7521	0.0339	0.0081	3.19e-05		6.91e-14	0.0465	0.0062
12	rs2943658	2	227123584	IRS1	No		,M,	A	G		61132	0.3606	0.0336	0.0062	5.76e-08		56712	0.3661	0.037	0.0063	4.48e-09		134936	0.3614	0.0105	0.0043	0.01488		19603	0.3588	0.0087	0.011	0.433		21011	0.348	0.0027	0.0108	0.8022		45994	0.3532	0.0033	0.0073	0.6479		1.2e-06	0.0263	0.0054
13	rs2580821	2	232804155	NPPC	No	All,M,W	All,M,W	C	A		61227.9	0.9196	0.064	0.0114	2.07e-08		56693.9	0.9169	0.0688	0.0113	1.35e-09		134940	0.9172	0.0453	0.0077	4.95e-09		17930	0.9162	0.0704	0.0207	0.0006544		19842	0.9104	0.0595	0.0187	0.001492		43691.9	0.9122	0.0405	0.0128	0.001508		2.71e-10	0.0633	0.01
14	rs13083798	3	52649748	PBRM1	No	All	All	A	G		63411.7	0.4911	0.0128	0.0058	0.02689		58893.7	0.4961	0.0148	0.0059	0.01282		140397	0.4938	0.0229	0.004	1.11e-08		20115.9	0.5009	0.0067	0.0106	0.5252		21517.9	0.5359	0.0067	0.0103	0.516		47238.7	0.5143	0.017	0.0069	0.01437		0.02325	0.0116	0.0051
14	rs2300149	3	52822921	ITIH1	No	All	All	C	T		60433.9	0.6129	0.0128	0.0061	0.03527		56971.9	0.6102	0.012	0.0062	0.05238		135528	0.6133	0.0208	0.0043	9.64e-07		17957	0.6231	0.027	0.0116	0.02039		18383	0.637	0.022	0.0118	0.06081		42373.9	0.6256	0.0277	0.0076	0.0002666		0.001865	0.0168	0.0054
15	rs7628338	3	72432888	RYBP	No	All		A	G		44436.8	0.6443	0.034	0.0074	4.69e-06		44489.8	0.6499	0.0348	0.0073	1.87e-06		109843	0.6441	0.0253	0.0048	1.41e-07		11903	0.6464	0.0297	0.0146	0.04248		14682	0.6536	0.0272	0.0131	0.03759		32970.9	0.6461	0.0194	0.0086	0.02526		1.18e-06	0.0322	0.0066
16	rs6772896	3	134203347	ANAPC13,CEP63	No	All	All	T	C		63435.7	0.6785	0.0295	0.0062	1.92e-06		58977.7	0.681	0.0264	0.0064	3.61e-05		140514	0.6784	0.0272	0.0044	4.38e-10		20114.9	0.6818	0.0149	0.0113	0.1849		21510.9	0.6836	0.0145	0.011	0.1874		47244.8	0.6801	0.0108	0.0074	0.1447		3.99e-06	0.0251	0.0054
17	rs7632381	3	141106063	ZBTB38	No	All,M,W	All,M,W	C	T		63410	0.4623	0.0349	0.006	6.56e-09		58955	0.4415	0.038	0.006	3.27e-10		140465	0.4504	0.0215	0.0042	2.28e-07		20108	0.4654	0.0431	0.0109	7.86e-05		21505	0.4206	0.0448	0.0105	1.87e-05		47232.9	0.4396	0.0323	0.007	4.24e-06		1.1e-11	0.0361	0.0053
17	rs1344672	3	141125705	ZBTB38	No	All,M,W	All,M,W	G	C		63333.9	0.4603	0.0341	0.006	1.42e-08		58875.9	0.4392	0.0374	0.0061	6.31e-10		140321	0.4497	0.0228	0.0042	8.42e-08		20074	0.4634	0.0449	0.011	4.48e-05		21470	0.4195	0.0462	0.0105	1.08e-05		47139.9	0.4385	0.0314	0.0071	1.07e-05		1.53e-11	0.0359	0.0053
18	rs17451107	3	156797609	LEKR1,CCNL1	No	All	All	T	C		63423.2	0.6163	0.0205	0.0062	0.000918		58965.2	0.6177	0.0241	0.0064	0.000165		140483	0.6139	0.03	0.0044	6.33e-12		20109.8	0.6184	0.0214	0.0112	0.05647		21505.8	0.6372	0.0222	0.011	0.04345		47220.3	0.6222	0.0293	0.0073	5.67e-05		0.000123	0.0209	0.0054
19	rs12493901	3	171922055	FNDC3B	No	All	All	G	A		62783.3	0.5326	0.0339	0.0061	3.55e-08		58352.3	0.5188	0.0337	0.0061	2.47e-08		139418	0.5234	0.0254	0.0042	1.11e-09		18580.9	0.5399	0.0128	0.0115	0.2668		19982.9	0.5303	0.0129	0.0107	0.2256		44665.5	0.5307	0.0209	0.0073	0.004153		1.28e-07	0.0288	0.0055
20	rs710841	4	82149831	PRKG2	No	All	All	T	C		62814.6	0.3038	0.0197	0.0067	0.003402		58367.6	0.2626	0.0238	0.0069	0.0005257		139477	0.2818	0.0214	0.0046	4e-06		18615.9	0.3075	0.0339	0.0125	0.006715		20015.9	0.2558	0.0227	0.0122	0.06281		44727.8	0.2775	0.0314	0.0082	0.0001212		0.0001056	0.0231	0.0059
21	rs7689420	4	145568352	HHIP	No	All,M,W	All,M,W	C	T		63460.9	0.8054	0.042	0.0076	2.6e-08		59002.9	0.8293	0.0492	0.008	7.55e-10		140550	0.8186	0.0276	0.0053	2.26e-07		20086	0.809	0.0372	0.0138	0.006967		21482	0.8375	0.0354	0.0139	0.0107		47180.9	0.8259	0.034	0.0092	0.000215		1.06e-09	0.0405	0.0066
21	rs1812175	4	145574844	HHIP	No	All,M,W	All,M,W	G	A		62897.8	0.8004	0.0414	0.0076	5.02e-08		58439.8	0.829	0.0506	0.008	2.44e-10		139612	0.8156	0.0268	0.0054	7.02e-07		18595	0.8026	0.0306	0.0143	0.03186		19991	0.8367	0.0346	0.0144	0.01616		44686.9	0.823	0.032	0.0094	0.0006961		5.56e-09	0.0389	0.0067
22	rs2637030	5	52976825	NDUFS4	No	All		G	A		62889.5	0.3592	0.0223	0.0061	0.0002717		58434.5	0.3697	0.0214	0.0061	0.0004964		139602	0.3644	0.0203	0.0042	1.66e-06		18634.9	0.361	0.0194	0.0115	0.09064		20031.9	0.3544	0.0149	0.0111	0.1776		44767.7	0.3592	0.0192	0.0074	0.00943		3.46e-05	0.0225	0.0054
23	rs6892330	5	88746405	MEF2C	No	All	All	T	C		63170.9	0.3486	0.0255	0.0063	5.82e-05		58713.9	0.3646	0.0229	0.0064	0.0003585		139969	0.3541	0.0259	0.0043	2.04e-09		19959.9	0.3528	0.0253	0.0114	0.02615		21355.9	0.392	0.0318	0.0107	0.002847		46850.9	0.3692	0.021	0.0073	0.003797		6.44e-06	0.0251	0.0056
24	rs4868126	5	171283469	C5orf50	No	All	All	G	T		62655.2	0.5849	0.0225	0.0062	0.0003046		58198.2	0.6095	0.0225	0.0064	0.0004341		139112	0.5966	0.0273	0.0043	2.19e-10		18497.8	0.5831	0.0156	0.0117	0.1827		19893.8	0.6351	0.0079	0.0115	0.4907		44412.4	0.6108	0.0104	0.0076	0.1709		0.0001984	0.0207	0.0056
25	rs6556301	5	176527577	FGFR4	No	All,M,W	All,M,W	T	G		54853.4	0.3614	0.0382	0.007	4.99e-08		55648.4	0.3621	0.0359	0.0067	1.02e-07		128637	0.3595	0.0345	0.0046	9.16e-14		15807.8	0.3652	0.0393	0.0131	0.002725		18891.8	0.3724	0.0379	0.0116	0.001077		40530.4	0.3669	0.0257	0.008	0.001362		7.5e-10	0.0381	0.0062
25	rs3088050	5	176726635	RAB24	No	All,M,W	All,M,W	A	G		62855.7	0.2126	0.039	0.0073	9.4e-08		58322.7	0.2179	0.0367	0.0073	4.59e-07		139472	0.215	0.0318	0.005	2.84e-10		18537.9	0.2155	0.0545	0.0138	7.53e-05		19874.9	0.2373	0.0493	0.0125	8.12e-05		44486.7	0.226	0.0288	0.0086	0.0008342		4.95e-11	0.0427	0.0065
26	rs806794	6	26200677	HIST1H2BF	No	All,M	All,M	A	G		63191.9	0.6784	0.0329	0.0063	2.12e-07		58733.9	0.6877	0.0348	0.0066	1.16e-07		139996	0.6885	0.0268	0.0044	1.66e-09		19968	0.6791	0.0206	0.0114	0.07111		21365	0.6735	0.0336	0.0109	0.002123		46875.9	0.6833	0.0302	0.0075	5.58e-05		1.56e-07	0.0293	0.0056
27	rs615672	6	32574171	HLA-DRB1	No	All		G	C		43764.9	0.6385	0.026	0.0074	0.0004399		43810.9	0.639	0.0255	0.0073	0.0004496		107214	0.6427	0.0235	0.0049	1.49e-06		13087	0.6338	0.0333	0.0136	0.01432		15863	0.6071	0.0164	0.0122	0.1793		34586	0.6279	0.025	0.0084	0.00272		4.03e-05	0.0271	0.0066
28	rs1759645	6	34194866	CYCSL1,HMGA1	No	All	All	C	T		63207.9	0.2356	0.021	0.0078	0.007502		58490.9	0.1701	0.0193	0.0084	0.02158		139772	0.2042	0.0271	0.0056	1.13e-06		19988	0.2328	0.0195	0.0143	0.1704		21383	0.1606	0.0202	0.0148	0.1714		46866.9	0.194	0.0403	0.0096	2.59e-05		0.002878	0.0205	0.0069
29	rs998584	6	43757896	VEGFA	No	All	All	A	C		62317.4	0.4624	0.004	0.0063	0.5241		57862.4	0.4863	-0.0003	0.0064	0.9624		138154	0.4738	0.0286	0.0045	2.16e-10		19717.6	0.4722	0.0181	0.0115	0.1142		21115.6	0.5202	0.0105	0.0112	0.3462		46302.7	0.4939	0.0373	0.0076	1.05e-06		0.2303	0.0067	0.0056
30	rs10080237	6	80854470	BCKDHB	No	All		T	C		44462.5	0.5592	0.0269	0.0071	0.0001425		44507.5	0.5622	0.0268	0.0069	9.72e-05		109887	0.5627	0.0232	0.0046	4.03e-07		11913.9	0.5562	0.0364	0.0138	0.008231		14689.9	0.5647	0.0158	0.0122	0.1947		32991.7	0.5612	0.0166	0.0082	0.04304		3.79e-06	0.0293	0.0063
31	rs7759938	6	105378954	HACE1	No	All,M,W	All,M,W	C	T		61497.7	0.3414	0.0435	0.0063	4.75e-12		56969.7	0.3219	0.0431	0.0065	3.61e-11		136557	0.3303	0.0286	0.0043	4.37e-11		19569.9	0.345	0.0478	0.0113	2.42e-05		19790.9	0.3203	0.042	0.0114	0.0002244		44970.9	0.3294	0.0372	0.0075	7.15e-07		6.32e-15	0.043	0.0055
32	rs7766106	6	127455138	RSPO3	No	All	All	T	C		62833.5	0.4712	0.0168	0.0058	0.003702		58385.5	0.4785	0.0118	0.006	0.04923		139497	0.4766	0.0249	0.0041	1.17e-09		18609.9	0.4737	0.0093	0.011	0.3979		20007.9	0.4818	0.004	0.0105	0.7039		44715.7	0.4806	0.0126	0.0071	0.0766		0.003302	0.0152	0.0052
33	rs4896582	6	142703877	GPR126	No	All,M,W	All,M,W	G	A		62121.4	0.658	0.0256	0.0066	0.0001029		58202.4	0.6922	0.0311	0.0065	2.05e-06		138424	0.675	0.0253	0.0045	1.32e-08		19785.9	0.6606	0.0531	0.0118	6.56e-06		21327.9	0.6843	0.0462	0.011	2.72e-05		46724.6	0.6775	0.0403	0.0075	8.63e-08		1.94e-08	0.0322	0.0057
33	rs6570508	6	142713842	GPR126	No	All,M,W	All,M,W	G	A		63402.4	0.6506	0.0259	0.0066	8.12e-05		58953.4	0.6874	0.0295	0.0065	5.95e-06		140454	0.6695	0.0248	0.0044	2.42e-08		20110.8	0.6546	0.052	0.0117	9.02e-06		21507.8	0.6812	0.0441	0.011	5.88e-05		47234.6	0.6736	0.0395	0.0075	1.46e-07		1.67e-08	0.0321	0.0057
34	rs798489	7	2801803	GNA12	No	M		C	T		62058.6	0.7166	0.0308	0.0068	6.9e-06		58064.6	0.713	0.0329	0.0067	1.04e-06		138194	0.7155	0.0222	0.0046	1.65e-06		19694.9	0.727	0.0343	0.0124	0.005662		21239.9	0.7374	0.0367	0.0122	0.002711		46539.7	0.731	0.0204	0.0082	0.01257		1.46e-07	0.0318	0.0061
35	rs10231365	7	20431585	ITGB8	No	All	All	T	C		44995.5	0.5093	0.0242	0.0069	0.0004546		45040.5	0.5134	0.0202	0.0068	0.002812		110765	0.511	0.0226	0.0046	7.17e-07		13397.9	0.5162	0.0386	0.0128	0.00262		16173.9	0.5536	0.0308	0.0118	0.008834		35463.7	0.5326	0.0248	0.0079	0.001613		1.07e-05	0.0273	0.0062
36	rs1055144	7	25871109	UBA52P1	No	All	All	T	C		62877	0.2067	0.0352	0.0075	3.05e-06		58350	0.2125	0.0324	0.0074	1.32e-05		139491	0.2053	0.0357	0.0052	6.11e-12		18584	0.2094	0.0281	0.0141	0.04565		19982	0.2598	0.0382	0.0125	0.002199		44668	0.23	0.0427	0.0087	1.02e-06		2.87e-06	0.0311	0.0066
37	rs849140	7	28183702	JAZF1	No	All	All	T	C		62662.6	0.4096	0.0296	0.0059	6.12e-07		58334.6	0.4105	0.0323	0.0061	1.11e-07		139289	0.4097	0.0266	0.0041	8.09e-11		18629.9	0.4163	0.0208	0.0111	0.06072		20028.9	0.4373	0.0164	0.0106	0.1229		44754.8	0.425	0.0214	0.0071	0.002483		1.65e-07	0.0275	0.0053
37	rs552707	7	28205303	JAZF1	No	All,W	All	T	C		58128.8	0.2927	0.0364	0.0068	8.29e-08		58173.8	0.2936	0.0356	0.0066	8.29e-08		134273	0.2923	0.0282	0.0046	9.84e-10		18537.9	0.2951	0.0268	0.0122	0.0286		21313.9	0.289	0.0191	0.0113	0.09075		45301.6	0.2913	0.0207	0.0078	0.008055		8.97e-09	0.0344	0.006
38	rs4738141	8	72469742	LOC100132809	No	All		G	A		57631.8	0.2817	0.0101	0.0071	0.154		57676.8	0.2686	0.0139	0.0069	0.0454		133251	0.2729	0.0222	0.0048	3.94e-06		18053	0.2822	0.0228	0.0128	0.07433		20829	0.3084	0.0338	0.0115	0.00329		44319.9	0.2913	0.022	0.008	0.006009		0.02676	0.0137	0.0062
39	rs10990303	9	98410405	PTCH1	No	All,W	All,W	T	C		62827.5	0.2305	0.0401	0.0071	1.57e-08		58370.5	0.2275	0.0344	0.0073	2.73e-06		139504	0.2283	0.0286	0.0049	6.07e-09		18543.9	0.2306	0.0261	0.0133	0.05043		19940.9	0.2427	0.0236	0.0126	0.06077		44566.5	0.2361	0.0228	0.0085	0.007094		7.59e-09	0.0365	0.0063
40	rs7032974	9	108918627	LOC100129319	Yes	M	M	T	C		45019.8	0.7151	0.0417	0.0077	7.1e-08		45064.8	0.719	0.0434	0.0076	1.31e-08		110811	0.7188	0.0229	0.0051	7.92e-06		13400	0.7138	0.02	0.0143	0.1624		16176	0.7325	0.0255	0.0132	0.0533		35478.9	0.7251	0.0219	0.0089	0.01332		1.4e-07	0.0361	0.0069
41	rs780159	10	80907147	LOC283050	Yes	All		G	A		62854	0.6034	0.0223	0.0062	0.0003206		58406	0.5895	0.0233	0.0061	0.000154		139544	0.594	0.0214	0.0043	4.91e-07		18615.5	0.6015	0.025	0.0115	0.03015		20014.5	0.5997	0.0116	0.0108	0.2829		44723.7	0.5975	0.0195	0.0073	0.007565		8.28e-05	0.0213	0.0054
42	rs231906	11	2752609	KCNQ1	No	W		G	A		62183.4	0.4326	0.0332	0.0063	1.56e-07		57726.4	0.4403	0.0343	0.0065	1.15e-07		138045	0.4329	0.0167	0.0044	0.0001377		18225.8	0.4311	0.0284	0.0118	0.01577		19621.8	0.4319	0.0125	0.0111	0.2604		43845.4	0.4293	0.0069	0.0075	0.3597		1.5e-08	0.0315	0.0056
43	rs2051773	11	17365209	NUCB2	No	All		G	A		63162.8	0.2864	0.0271	0.0067	5.82e-05		58707.8	0.2966	0.0292	0.0066	1.08e-05		139928	0.2911	0.0235	0.0046	2.76e-07		19904.9	0.2884	0.0243	0.0121	0.04551		21241.9	0.3047	0.0193	0.0113	0.08829		46673.8	0.2967	0.0173	0.0077	0.02503		5.03e-06	0.0271	0.0059
44	rs4963975	12	26443030	ITPR2-SSPN	No	All	All	A	G		62515.6	0.2558	0.0112	0.0069	0.1029		58057.6	0.2518	0.008	0.0069	0.2457		138695	0.2535	0.0225	0.0047	1.66e-06		18536.9	0.2608	0.0326	0.0127	0.01023		19933.9	0.2527	0.0182	0.0122	0.1368		44509.6	0.2555	0.0291	0.0082	0.0003753		0.008288	0.016	0.0061
45	rs10843151	12	28471319	CCDC91	No	All	All	G	A		42366.6	0.6926	0.0305	0.0084	0.0002679		42322.6	0.6916	0.0287	0.0082	0.0004446		104200	0.6901	0.0311	0.0055	1.39e-08		11994.9	0.6888	0.0299	0.0156	0.0563		11353.9	0.6889	0.0346	0.0161	0.03121		28400.7	0.6884	0.0294	0.0101	0.003491		8.64e-05	0.0293	0.0075
46	rs10876528	12	54421476	HOXC6 HOXC4	No	All,W	All,W	A	C		49627.2	0.3565	0.0308	0.007	1.02e-05		49538.2	0.3582	0.0292	0.0069	2.46e-05		116766	0.3539	0.0292	0.0047	4.45e-10		16682.8	0.3557	0.0513	0.0122	2.74e-05		19365.8	0.3426	0.0351	0.0115	0.002309		41616.3	0.3493	0.0295	0.0078	0.0001518		1.02e-08	0.0349	0.0061
47	rs12317176	12	124404718	DNAH10	No	All	All	T	C		63433.7	0.6397	0.0112	0.0062	0.07124		58976.7	0.6607	0.0015	0.0063	0.8076		140513	0.65	0.0302	0.0043	1.61e-12		20121.9	0.6426	0.0036	0.0112	0.7503		21518.9	0.6794	-0.0033	0.011	0.7663		47250.8	0.6607	0.0085	0.0073	0.2476		0.06257	0.0101	0.0054
48	rs975210	15	70364352	TLE3	No	All		A	G		63102.8	0.1799	0.0379	0.0079	1.6e-06		58645.8	0.1816	0.0375	0.0081	4e-06		139836	0.1811	0.0275	0.0055	6.28e-07		19688	0.1812	0.0254	0.0142	0.07437		21084	0.1815	0.0229	0.0138	0.09772		46431.9	0.1804	0.0199	0.0095	0.03545		4.02e-07	0.0352	0.0069
49	rs4886782	15	74228810	LOXL1	No	All,M,W	All,M,W	G	A		62594.7	0.6375	0.0353	0.0065	5.44e-08		58137.7	0.6292	0.0377	0.0065	5.58e-09		139010	0.6305	0.0269	0.0044	1.01e-09		18412.9	0.648	0.0444	0.0124	0.0003405		19750.9	0.6592	0.0307	0.0117	0.008857		44176.6	0.6456	0.02	0.0078	0.01059		1.92e-10	0.0369	0.0058
50	rs4842838	15	84582124	ADAMTSL3	No	All,M,W	All,M,W	T	G		62503	0.5438	0.0472	0.0059	1.97e-15		58045	0.5284	0.0503	0.006	7.59e-17		138669	0.5348	0.0418	0.0041	3.79e-24		18536	0.5444	0.0216	0.0111	0.05173		19932	0.5411	0.0281	0.0105	0.007481		44510	0.5372	0.0246	0.0071	0.0005076		2.29e-14	0.0401	0.0053
50	rs2030839	15	84583959	ADAMTSL3	No	All,M,W	All,M,W	C	T		62480	0.5443	0.0475	0.0059	1.23e-15		58042	0.5291	0.0507	0.006	4.19e-17		138643	0.5353	0.0416	0.0041	6.43e-24		18532	0.545	0.0217	0.0111	0.05114		19930	0.5414	0.0281	0.0105	0.007582		44504	0.5376	0.0245	0.0071	0.0005397		1.38e-14	0.0405	0.0053
51	rs7176527	15	85140794	FLJ40113*	Yes	All		C	T		42515.7	0.8085	0.0426	0.0093	4.75e-06		42471.7	0.8076	0.043	0.009	1.98e-06		104501	0.8083	0.0333	0.0061	3.93e-08		12049.9	0.808	-0.0023	0.0176	0.8978		11408.9	0.8086	0.0024	0.0181	0.8935		28522.8	0.8083	0.0163	0.0114	0.1536		0.0001821	0.0311	0.0083
52	rs3817428	15	89415247	ACAN	No	All	All	C	G		44673	0.7319	0.0311	0.0083	0.0001689		44719	0.7308	0.0283	0.0081	0.0004767		110073	0.7327	0.0298	0.0053	2.37e-08		13271.8	0.73	0.0093	0.0154	0.5446		16047.8	0.747	0.0144	0.0151	0.3407		35165.3	0.7406	0.0177	0.0098	0.07027		0.001343	0.0236	0.0074
53	rs7184253	16	67380550	LRRC36	No	All	All	T	C		44901.9	0.8441	0.0507	0.0156	0.001122		45064.9	0.8854	0.0544	0.0156	0.0004948		110595	0.8755	0.0547	0.0104	1.41e-07		11777	0.8579	0.0377	0.0294	0.1987		14435	0.9011	0.053	0.0251	0.035		32171	0.8923	0.0495	0.018	0.005905		0.0002385	0.0502	0.0137
53	rs8055190	16	67391618	LRRC36	No	All	All	C	T		44839	0.8417	0.0562	0.0154	0.0002708		45002	0.8846	0.0527	0.0155	0.0006767		110277	0.8731	0.0557	0.0104	7.96e-08		11751	0.852	0.043	0.0291	0.1393		14409	0.8998	0.0543	0.0251	0.03029		32122	0.8897	0.0424	0.0179	0.01764		2.37e-05	0.0574	0.0136
54	rs741677	17	463843	VPS53	No	All	All	A	G		44435.8	0.5704	0.0265	0.0071	0.0001891		44488.8	0.5688	0.0238	0.007	0.0006775		109844	0.5689	0.0232	0.0047	9.44e-07		11906	0.5669	0.0306	0.0139	0.02778		14684	0.5439	0.0245	0.0123	0.04718		32977.9	0.5575	0.0301	0.0083	0.0002722		4.76e-05	0.026	0.0064
55	rs757608	17	59497277	C17orf82	No	All	All	A	G		62891.5	0.3095	0.0302	0.0063	1.69e-06		58433.5	0.3186	0.0333	0.0064	1.97e-07		139605	0.3157	0.0278	0.0043	1.21e-10		18632.8	0.3112	0.0115	0.0119	0.3311		20028.8	0.3301	0.0187	0.0111	0.09365		44765.6	0.3237	0.0221	0.0076	0.003552		1.1e-05	0.0247	0.0056
56	rs4800452	18	20727611	CABLES1	No	All,M,W	All,M,W	T	C		62500.8	0.7684	0.0459	0.0071	1.2e-10		56533.8	0.7822	0.05	0.0074	1.53e-11		135910	0.7773	0.0427	0.005	1.05e-17		19173.9	0.7742	0.0285	0.0132	0.03029		16802.9	0.7879	0.0275	0.0144	0.05501		40774.8	0.7808	0.0234	0.009	0.009696		3.72e-11	0.0416	0.0063
56	rs4239436	18	20731930	CABLES1	No	All,M,W	All,M,W	G	A		63461.7	0.7952	0.0491	0.0074	2.31e-11		59003.7	0.7903	0.0476	0.0074	1.3e-10		140546	0.794	0.0433	0.0051	2.99e-17		20121.9	0.8015	0.0329	0.0134	0.0139		21472.9	0.8033	0.0348	0.0129	0.007057		47210.8	0.7998	0.028	0.0086	0.001201		2.47e-12	0.0453	0.0065
56	rs4308051	18	20735461	CABLES1	No	All,M,W	All,M,W	G	T		63455.7	0.7954	0.0488	0.0073	3.02e-11		58997.7	0.7906	0.0478	0.0074	1.16e-10		140538	0.7946	0.0427	0.0051	7.36e-17		20121.9	0.8015	0.0334	0.0135	0.01316		21472.9	0.8035	0.035	0.0129	0.006619		47205.7	0.8005	0.0259	0.0087	0.002894		2.69e-12	0.0452	0.0065
57	rs4542783	19	8642160	MYO1F	No	All		T	C		44032.6	0.5315	0.0179	0.0072	0.01312		45498.6	0.5341	0.017	0.007	0.01456		106601	0.5413	0.0223	0.0049	4.69e-06		14993.9	0.5388	0.0514	0.0129	6.69e-05		18120.9	0.5366	0.0355	0.0117	0.002448		38523.6	0.5436	0.0265	0.008	0.000942		3.68e-05	0.0261	0.0063
58	rs3786897	19	33893008	PEPD	No	All	All	G	A		62916.4	0.4315	0.0186	0.006	0.00176		58458.4	0.4149	0.0207	0.0061	0.0007384		139980	0.4238	0.0231	0.0042	3.44e-08		20105.9	0.4295	0.0362	0.0109	0.0009154		21498.9	0.3927	0.0206	0.0107	0.05467		47222.6	0.4116	0.0199	0.0071	0.005228		2.57e-05	0.0222	0.0053
59	rs1884897	20	6612832	LOC149844	No	All	All	A	G		62660.7	0.368	0.0163	0.0061	0.007739		58417.7	0.3649	0.0177	0.0062	0.004189		139354	0.3681	0.0226	0.0043	1.25e-07		18622.9	0.3733	0.0156	0.0113	0.1702		20027.9	0.3796	0.0116	0.0108	0.2826		44752.8	0.3754	0.0216	0.0073	0.003237		0.001467	0.0171	0.0054
Chr: chromosome; Pos(hg19): position based on human assembly 19; All: all men and women; W: women only; M: men only; EAF: effect allele frequency; SE: standard error; Beta, SE or P adjPA: estimate adjusted for physical activity; Pint: p-value for interaction; Pjoint: p-value for the joint effect including both the main and interaction effects
a No SNPxPA interaction effects defined by interaction approach 1 or approach 2 were identified for Waist circumference adjusted for BMI in the all ancestries analyses.
b SNP adjusted PA: SNPs selected for genome-wide significance (PadjPA<5x10-8) in the SNP adjusted for PA model. The strata where any SNPs were identify are indicated.
c SNP Joint 2df: SNPs selected for genome-wide significance (PadjPA<5x10-8) in the Joint model of the SNP main and SNP×PA interaction effects. The strata where any SNPs were identify are indicated.
[truncated: 12 more columns]
