# Supplementary material for: Genome-wide physical activity interactions in adiposity ― A meta-analysis of 200,452 adults
Source: PLoS Genet. 2017 Apr 27;13(4):e1006528. doi: 10.1371/journal.pgen.1006528 (PMC5407576; doi:10.1371/journal.pgen.1006528)
Supplement: S17 Table — (XLSX) [file pgen.1006528.s022.xlsx]

## Sheet: TS17.Secondary_signals
Supplementary Table 17 - Results for approximate conditional analyses to identify secondary signals in the novel BMI, WCadjBMI or WHRadjBMI-associated locia
trait	Strata	SNP	Chr	Pos (hg19)	trait increasing Allele	trait-descreasing Allele	Nearest Gene	lead SNP (conditioning SNP)	Trait in which locus was first identified	Pos (hg19) of lead SNP	R2 with our lead SNP	EAFb	NadjPA	BetaadjPA	SEadjPA	PadjPA	Pint	Pjoint	BetaadjPA	SEadjPA	PadjPA	Pint	Pjoint
BMI	European, sex combined	rs2075171	2	58688907	G	A	FLJ30838	rs6731302	Overweight	58544321	0.09	0.7618	172295	0.0263	0.0046	7.87e-09	0.928247	4.5e-08	0.0199152	0.00439566	5.88017e-06	0.417621	2.08268e-05
BMI	European, sex combined	rs757318	19	18820308	C	A	CRTC1	rs17724992	BMI	19185791	0.001	0.512	176564	0.0213	0.0038	2.01e-08	0.488976	3.96e-08	0.0206012	0.00379423	5.6481e-08	0.499895	1.06927e-07
WCadjBMI	European, sex combined	rs2637030	5	52976825	G	A	NDUFS4	rs1664789	WCadjBMI	52671001	0.032	0.375	164434	0.0221	0.0039	1.1e-08	0.79466	1.01e-07	0.0220386	0.00390032	1.60017e-08	0.792412	1.10076e-07
WCadjBMI	European, sex combined	rs6892330	5	88746405	T	C	MEF2C	rs6894139	Height	89165028	0.105	0.5533	166881	0.0217	0.0039	3.48e-08	0.351015	8.2e-08	0.0217392	0.00390033	2.49413e-08	0.464621	1.81677e-06
WCadjBMI	European, Women	rs1465370	7	130013638	G	T	CPA1	rs13241538	HIPadjBMI	129724110	0.09	0.6784	78293.5	0.0318	0.0058	3.3e-08	0.772863	1.18e-07	0.0317567	0.00580099	4.39087e-08	0.771151	1.24247e-07
BMI	All Ancestry, Women	rs1998710	1	190670884	T	C	RP11-463J7.2	rs10920678	BMI	191101861	0.01	0.513	91442.2	0.0282	0.0051	3.69e-08	0.240039	1.3e-08	0.0264745	0.00506628	1.73572e-07	0.193602	7.81792e-08
BMI	All Ancestry, sex combined	rs4146429	10	104401632	C	T	RP11-47A8.5	rs11191560	BMI	103934226	0.31	0.1082	191003	0.0311	0.006	2.36e-07	0.386619	3.86e-08	0.01808	0.00530359	0.00065196	0.276781	0.0095855
BMI	All Ancestry, sex combined	rs1808192	17	45794706	A	G	TBKBP1	rs11652097	BMI	46272695	0.26	0.3284	189879	0.0227	0.004	1.75e-08	0.024261	2.74e-09	0.0168466	0.00367317	4.50992e-06	0.161533	0.000437169
Chr: chromosome; Pos(hg19): position based on human assembly 19; EAF: effect allele frequency; NadjPA, BetaadjPA, SEadjPA, or PadjPA: sample size, effect size, standard error, or P value, respectively, in the physical activity adjusted SNP main effect model; Pint: P value for interaction; Pjoint: P value for the joint test of main and interaction effects
a Conditional analyses were performed based on the most significant P value, either PadjPA and /or Pjoint. If Pjoint was most significant, the conditional analyses of Active and Inactive strata were performed and the Pdiff and Pjoint were calulcated based on the conditioned results.
b EAF: Effect-allele frequency (based on the frequency in men and women combined for the indicated variant).
