# Supplementary material for: Genome-wide physical activity interactions in adiposity ― A meta-analysis of 200,452 adults
Source: PLoS Genet. 2017 Apr 27;13(4):e1006528. doi: 10.1371/journal.pgen.1006528 (PMC5407576; doi:10.1371/journal.pgen.1006528)
Supplement: S20 Table — (XLSX) [file pgen.1006528.s025.xlsx]

## Sheet: TS20. Enrichment_SNPadjPA BMI
Supplementary Table 20 - Enrichment of loci showing association with BMI (PadjPA<5x10-8) with functional genomic elements in adipose, brain, and muscle tissue cell lines from the Roadmap Epigenomics Project.
Cell line ID	Tissue	Cell Description	Active Promoter	Enhancer	Bivalent Enhancer	Bivalent Poised TSS	Flanking Active TSS	Bivalent Flank TSS/Enhancer	Genic Enhancer	Heterochromatin	Quiescent/Low	Repressed PolyComb	Strong Transcription	Transcription at gene 5' or 3'	Weak Repressed	Weak Transcription
			P value	P value	P value	P value	P value	P value	P value	P value	P value	P value	P value	P value	P value	P value
E023	Adipose	FAT.MSC.DR.ADIP	0.1341	0.1942	0.0199	0.0999	0.6772	1	0.9836	0.9554	0.8711	0.2937	0.108	0.5394	0.323	0.0045
E025	Adipose	FAT.ADIP.DR.MSC	0.0147	0.4618	0.0241	0.2586	0.5227	0.0078	0.4878	0.9993	0.3818	0.0319	0.0457	0.6335	0.4461	0.1438
E063	Adipose	FAT.ADIP.NUC	0.5812	0.1692	0.0066	0.2865	0.1835	0.0945	0.6767	0.9338	0.4601	0.0416	0.0467	1	0.2042	0.0062
E067	Brain	BRN.ANG.GYR	0.0653	0.0384	0.0216	0.0948	0.1486	0.1656	0.1332	0.9893	0.7205	0.0002	0.0654	1	0.8694	0.001
E068	Brain	BRN.ANT.CAUD	0.2176	0.0002	0.2496	0.112	0.1227	0.2565	0.4781	0.9462	0.7942	0.1436	0.3336	0.2548	0.7497	0.0005
E069	Brain	BRN.CING.GYR	0.3007	0.0001	0.0928	0.231	0.4709	0.0747	0.0275	0.8972	0.783	0.0129	0.1036	0.0219	0.7552	0.0001
E070	Brain	BRN.GRM.MTRX	0.0173	0.0224	0.2082	0.2752	0.0171	0.4169	0.155	0.5946	0.5904	0.1527	0.0422	1	0.0371	0.0184
E071	Brain	BRN.HIPP.MID	0.102	0.0232	0.4794	0.0614	0.4645	0.0473	0.0047	0.9098	0.7384	0.0251	0.3126	0.2396	0.9475	0.0062
E072	Brain	BRN.INF.TMP	0.3947	0.0009	0.3203	0.1729	0.0315	0.0082	0.0159	0.9428	0.4378	0.0022	0.0891	0.0333	0.7888	0.003
E073	Brain	BRN.DL.PRFRNTL.CRTX	0.3834	0.0317	0.304	0.006	0.014	0.0405	0.0561	0.6772	0.9415	0.005	0.0659	0.2317	0.8739	0.0007
E074	Brain	BRN.SUB.NIG	0.2915	0.0103	0.0534	0.3332	0.3589	0.0227	0.05	0.9553	0.9368	0.0141	0.554	0.1591	0.2938	0.001
E081	Brain	BRN.FET.M	0.2875	0.0472	0.0222	1	0.1026	1	1	0.7191	0.1478	0.2642	0.3848	1	0.1144	0.2883
E082	Brain	BRN.FET.F	0.1352	0.4847	0.0025	0.0714	0.5561	0.2055	0.1634	0.7432	0.3973	0.071	0.1418	0.0566	0.1789	0.0039
E125	Brain	BRN.NHA	0.2421	0.8009	0.0232	0.4254	0.1235	0.1032	0.1557	0.9453	0.4343	0.0973	0.0599	1	0.3472	0.0331
E052	Muscle	MUS.SAT	0.3858	0.2307	0.1823	0.4343	0.1092	0.433	0.4206	0.9032	0.6645	0.1622	0.3244	0.6023	0.4188	0.0135
E089	Muscle	MUS.TRNK.FET	0.1533	0.0272	0.0595	0.5138	0.6211	0.014	0.0019	0.8168	0.5887	0.1554	0.0005	0.2651	0.6871	0.0542
E090	Muscle	MUS.LEG.FET	0.7894	0.0504	0.0151	0.5513	0.125	0.0945	0.0012	0.4883	0.3541	0.1751	0.0266	0.3989	0.6051	0.045
E100	Muscle	MUS.PSOAS	0.1665	0.1576	0.1907	0.0479	0.3558	0.0719	1	0.848	0.7861	0.0002	0.1082	1	0.2352	0.0169
E107	Muscle	MUS.SKLT.M	0.839	0.2371	0.1411	1	0.0176	0.0147	0.0013	0.9949	0.5367	0.1443	0.0254	0.0249	0.717	0.0109
E108	Muscle	MUS.SKLT.F	0.3291	0.0321	0.0387	1	0.0543	0.0216	0.0051	0.9225	0.773	0.0119	0.1898	0.0035	0.7622	0.0036
E120	Muscle	MUS.HSMM	0.6952	0.1697	0.2148	0.0065	0.0591	0.1281	0.3566	0.9809	0.9689	0.2008	0.0753	0.5776	0.5089	0.0099
E121	Muscle	MUS.HSMMT	0.544	0.4665	0.3754	0.1044	0.477	1	0.3443	0.998	0.948	0.3882	0.0789	1	0.1201	0.017
