# Supplementary material for: Genome-wide physical activity interactions in adiposity ― A meta-analysis of 200,452 adults
Source: PLoS Genet. 2017 Apr 27;13(4):e1006528. doi: 10.1371/journal.pgen.1006528 (PMC5407576; doi:10.1371/journal.pgen.1006528)
Supplement: S22 Table — (XLSX) [file pgen.1006528.s027.xlsx]

## Sheet: TS22.NovelSNPs_GTlookup_unadjPA
Supplementary Table 22 - Association of novel loci identified for interaction with physical activity, for physical activity-adjusted SNP main effect, or for joint association of the SNP main effect and physical activity interaction, in GIANT results not accounting for physical activity.
Trait	SNP	Nearest	Chr	Pos (hg19)	Trait increasing/	Analysis strata	EAFb	NadjPA	BetaadjPA	SEadjPA	PadjPA	Pint	Pjoint	EAFc	N	Beta	SE	P
		Gene			decreasing alleles
Novel loci achieving genome-wide significance in European-ancestry meta-analyses
BMI	rs1720825	MRAS	3	138108083	A/G	Overall	0.2	178833	0.026	0.0047	2.98e-08	0.162	3.67e-08	0.2167	321909	0.0171	0.0038	8.388e-06
						Women		102854	0.0281	0.006	2.84e-06	0.0727	3.35e-06		171859	0.0244	0.0049	5.257e-07
						Men		47544	0.024	0.0069	0.000491	0.995	0.013		152761	0.0101	0.005	0.04245
BMI	rs1934100	ELAVL2	9	23234308	A/T	Overall	0.68	140811	0.0179	0.0049	0.000243	0.0399	0.000215	0.75	232901	0.0076	0.0043	0.07715
						Women		85142	0.0048	0.006	0.418	0.989	0.737		131532	0.0004	0.0053	0.9398
						Men		41958	0.0377	0.0074	3.18e-07	0.000884	3.7e-08		104080	0.0168	0.0058	0.003773
WCadjBMI	rs7176527	ZSCAN2	15	85140794	C/T	Overall	0.81	130413	0.0317	0.0054	5.98e-09	0.179	2.8e-08	0.8417	139204	0.024	0.0057	2.8e-05
						Women		77349	0.0303	0.007	1.37e-05	0.936	0.000128		83407	0.023	0.0071	0.0013
						Men		52918	0.0342	0.0084	4.55e-05	0.0323	7.5e-06		98583.7	-0.007	0.0067	0.2961
WHRadjBMI	rs4650943	PAPPA2	1	176414781	A/G	Overall	0.53	113963	0.0267	0.0048	2.34e-08	0.177	5.76e-08	0.6417	141522	0.018	0.0045	7.6e-05
						Women		69016	0.0301	0.006	4.66e-07	0.00779	1.57e-07		85687	0.02	0.0056	0.00029
						Men		44430	0.0212	0.0073	0.00355	0.273	0.00564		55970	0.013	0.0068	0.06
WHRadjBMI	rs2300481	MEIS1	2	66782467	T/C	Overall	0.39	110881	0.0267	0.0048	2.41e-08	0.58	3.93e-08	0.4417	131778	0.018	0.0045	5.2e-05
						Women		66519	0.0288	0.0059	1.19e-06	0.471	1.47e-06		79283	0.028	0.0056	8.3e-07
						Men		43845	0.0258	0.0073	0.000414	1	0.00282		52630	0.0039	0.0068	0.57
WHRadjBMI	rs167025	ARHGEF28	5	73433308	A/G	Overall	0.33	117603	0.0179	0.0048	0.000213	0.801	0.000464	0.3583	142590	0.0071	0.0045	0.11
						Women		70494	0.0023	0.006	0.701	0.45	0.732		86254	0.0036	0.0056	0.52
						Men		46591	0.0427	0.0074	6.24e-09	0.134	3.73e-09		56471	0.014	0.0069	0.038
WHRadjBMI	rs3094013	HCP5	6	31434366	G/A	Overall	0.87	149338	0.0269	0.0061	1.06e-05	0.498	6.93e-05	0.85	208386	0.023	0.0055	2.5e-05
						Women		84538	0.0104	0.0078	0.182	0.45	0.378		115690	0.01	0.0073	0.17
						Men		64138	0.0494	0.009	4.51e-08	0.891	7.87e-07		92830	0.038	0.0081	3.7e-06
WHRadjBMI	rs6976930	BAZ1B	7	72885810	G/A	Overall	0.81	145913	0.0294	0.0051	1.03e-08	0.528	1.87e-08	0.8083	209621	0.018	0.0044	4.8e-05
						Women		83184	0.0326	0.0066	7.7e-07	0.7	2.02e-06		116476	0.019	0.0058	0.0012
						Men		62149	0.0254	0.0075	0.000769	0.593	0.0031		93279	0.018	0.0063	0.005
WHRadjBMI	rs10786152	PLCE1	10	95893514	A/G	Overall	0.52	147123	0.0224	0.004	1.79e-08	0.0876	1.44e-08	0.5333	209986	0.0083	0.0034	0.014
						Women		83884	0.0192	0.0051	0.000156	0.0581	0.000141		116694	0.0025	0.0045	0.57
						Men		62722	0.0255	0.0058	1.32e-05	0.638	5.89e-05		93426	0.016	0.0049	0.0016
WHRadjBMI	rs889512	CTRB2	16	75242012	C/G	Overall	0.88	117417	0.031	0.0074	2.7e-05	0.426	0.000113	0.8583	130257	0.021	0.0072	0.0032
						Women		70315	0.0506	0.0091	2.87e-08	0.0996	1.09e-07		79540	0.033	0.009	0.00028
						Men		46440	-0.0022	0.0114	0.85	0.506	0.78		50853	0	0.011	1
Novel loci achieving genome-wide significance in all-ancestry meta-analyses
BMI	rs754635	CCK	3	42305131	G/C	Overall	0.87	151282	0.0356	0.0062	1.07e-08	0.121	3.28e-07	0.9167	234756	0.0201	0.0057	0.0004214
						Women		91241	0.026	0.0079	0.000966	0.125	0.000869		131239	0.0188	0.0074	0.01107
						Men		62741	0.0486	0.0093	1.61e-07	0.298	3.68e-06		104066	0.0241	0.0079	0.002284
Chr: chromosome; Pos(hg19): position based on human genome assembly 19; EAF: effect allele frequency; NadjPA, BetaadjPA, SEadjPA, or PadjPA: sample size, effect size, standard error, or P value, respectively, in the physical activity adjusted SNP main effect model; Pint: P value for interaction; Pjoint: P value for the joint test of main and interaction effects
a Meta-analyses results from the Giant consortium for BMI, Waist circumference adjusted for BMI, and Waist-to-hip ratio adjusted for BMI: http://portals.broadinstitute.org/collaboration/giant/index.php/GIANT_consortium_data_files . (Waist circumference adjusted for BMI, and Waist-to-hip ratio adjusted for BMI reported in Shungin D, Winkler TW, Croteau-Chonka DC, Ferreira T, Locke AE, Magi R, Stra…
b EAF: (effect-allele frequency) based on the frequency in men and women combined
c EAF: (effect-allele frequency) from HapMap2 CEU reference panel.
